1           **A genome-wide CRISPRi screen reveals a StkP-mediated connection**  
2           **between cell-wall integrity and competence in *Streptococcus salivarius***

3  
4  
5   Adrien Knoops<sup>a</sup>, Alexandra Waegemans<sup>a</sup>, Morgane Lamontagne<sup>a</sup>, Baptiste Decat<sup>a</sup>, Johann  
6   Mignolet<sup>a,b</sup>, Jan-Willem Veening<sup>b</sup>, Pascal Hols<sup>a#</sup>

7  
8   <sup>a</sup> Louvain Institute of Biomolecular Science and Technology, Biochemistry and Genetics of  
9   Microorganisms, Université catholique de Louvain, Louvain-La-Neuve, Belgium

10   <sup>b</sup> Department of Fundamental Microbiology, Faculty of Biology and Medicine, University of  
11   Lausanne, Lausanne, Switzerland

12  
13   # Address correspondence to Pascal Hols, [Pascal.Hols@uclouvain.be](mailto:Pascal.Hols@uclouvain.be)

14  
15   **Running head**

16   Competence-cell wall interplay in streptococci

17  
18   **Keywords**

19   Cell-to-cell communication, genome-wide screen, quorum sensing, DNA transformation,  
20   ComRS, cell-wall, CRISPRi, serine-threonine kinase.

21   **Word counts**

22   Abstract: 180

23   Importance: 124

24   Main text: 5,600

25  
26   **This file contains**

27   Main text

28   Table 1 to 3

29   Figure 1 to 6

30

31 **ABSTRACT**

32 Competence is one of the most efficient bacterial evolutionary and adaptative strategies by  
33 synchronizing production of antibacterial compounds and integration of DNA released by dead  
34 cells. In most streptococci, this tactic is orchestrated by the ComRS system, a pheromone  
35 communication device providing a sharp time window of activation in which only part of the  
36 population is responsive. Understanding how this developmental process integrates multiple  
37 inputs to fine-tune the adequate response is a long-standing question. However, essential genes  
38 involved in the regulation of ComRS have been challenging to study. In this work, we built a  
39 conditional mutant library using CRISPR-interference and performed three complementary  
40 screens to investigate competence genetic regulation in the human commensal *Streptococcus*  
41 *salivarius*. We show that initiation of competence increases upon cell-wall impairment,  
42 suggesting a connection between cell envelope stress and competence activation. Notably, we  
43 report a key role for StkP, a serine-threonine kinase known to regulate cell-wall homeostasis.  
44 We show that StkP controls competence by a mechanism that reacts to peptidoglycan  
45 fragments. Together, our data suggest a key cell-wall sensing mechanism coupling competence  
46 to cell envelope integrity.

47

48 **IMPORTANCE**

49 Survival of human commensal streptococci in the digestive tract requires efficient strategies  
50 which must be tightly and collectively controlled for responding to competitive pressure and  
51 drastic environmental changes. In this context, the autocrine signaling system ComRS  
52 controlling competence for natural transformation and predation in salivarius streptococci could  
53 be seen as a multi-input device integrating a variety of environmental stimuli. In this work, we  
54 revealed novel positive and negative competence modulators by using a genome-wide CRISPR-  
55 interference strategy. Notably, we highlighted an unexpected connection between bacterial  
56 envelope integrity and competence activation that involves several cell-wall sensors. Together,  
57 these results showcase how commensal streptococci can fine-tune the pheromone-based  
58 competence system by responding to multiple inputs affecting their physiological status in order  
59 to calibrate an appropriate collective behavior.

60

## 61 INTRODUCTION

62 In the human digestive tract, bacteria face highly competitive pressure and physicochemical  
63 challenges. Surviving in this environment requires powerful and efficient strategies which must  
64 be tightly controlled and collectively coordinated (1-3). Quorum sensing (QS) devices are  
65 particularly suited to control concerted survival tactics since they perform bacterial density  
66 sensing. Initially thought to be restricted to this role, recent evidences suggest that QS systems  
67 can operate as autocrine modules and process multiple inputs (4). On the one hand, QS  
68 autocrine signaling allows heterogeneity amplification by positive feedback loops, a key feature  
69 for sub-populations activation (5-7). On the other hand, environmental stimuli can fine-tune the  
70 sensitivity of the pheromone-based apparatus (8, 9). This latter property is switching the QS  
71 property from a cell-density to a multi-input device, integrating diverse stimuli to calibrate  
72 population-wide strategies (4).

73 One of the best characterized QS-mediated process in Gram-positive bacteria is competence  
74 regulation (10). Orchestrating predation through bacteriocin production together with natural  
75 transformation, competence is regulated by two types of signaling systems in streptococci (11).  
76 The ComCDE system found in the mitis and anginosus groups relies on the sensing of the  
77 extracellular pheromone CSP (competence stimulating peptide) that induces a phosphorelay  
78 leading to transcriptional activation of competence genes comprising *comX*, which codes for  
79 the master competence-specific sigma factor (12). The alternative predominant system in  
80 streptococci is based on the production/maturation of the pheromone XIP (*comX*-inducer  
81 peptide), which is internalized by the Opp transporter and binds the intracellular receptor ComR  
82 (13, 14). Subsequently, the dimeric ComR·XIP complex activates several bacteriocin and  
83 competence genes including *comX* (15-17).

84 Uncovering the environmental triggers allowing permissive conditions for competence QS has  
85 remained challenging in streptococci (18). Since two-component systems (TCS) and serine-

86 threonine kinases (STK) are dedicated to sense the outside world, they constitute attractive  
87 targets to couple environmental stimuli to QS reactivity. In *Streptococcus pneumoniae*, several  
88 of those sensors (e.g. StkP, CiaRH, VicRK) have been highlighted to control the ComCDE  
89 activity upon pH, O<sub>2</sub>, cell density or antibiotic stresses (9, 19-23). In the cariogenic  
90 *Streptococcus mutans* species, other distal regulators have been highlighted such as ScnRK,  
91 HdrM, BrsRM, CiaRH or StkP that link competence activation to various growth conditions  
92 (pH, carbohydrate source, oxygen, cell density) (24-31). In salivarius streptococci, we recently  
93 uncovered a regulatory inhibition of the CovRS environmental sensor on the ComRS signaling  
94 system (7). As exemplified by these three cases, despite the fact that environmental triggers can  
95 be shared, environmental sensors bridging detection of stimuli to competence can be highly  
96 divergent between species.

97 To investigate key sensors generating permissive conditions for competence activation,  
98 genome-wide screens are the fastest and most-suited approaches. While Tn-seq strategies have  
99 already revealed several regulators in *S. mutans* and *S. pneumoniae* (32, 33), classical knock-  
100 out characterization of the identified genes is often impaired by their essentiality. Recently, a  
101 genome-wide CRISPR-interference (CRISPRi) screening method was shown to overcome this  
102 drawback for *Escherichia coli* and *S. pneumoniae* (34-36). This technique combines the use of  
103 a guide RNA (gRNA) library targeting the whole genome together with a catalytically dead  
104 mutant of Cas9 (dCas9), producing transcriptional interference upon DNA binding. Plugging  
105 the dCas9 under the control of an inducible promoter allows the construction of a conditional  
106 mutant library which can be used for genetic screens and further for characterization of essential  
107 genes by knocking down their expression (34, 35).

108 In this work, we used this technique in combination with three distinct screens to unveil novel  
109 competence regulators. Cross-validation of the hits obtained from the three screens converged  
110 towards a connection between impairment of cell-wall biogenesis and competence activation.

111 Coherently, several sensors of the bacterial envelope integrity were identified among which  
112 StkP, suggesting a putative signaling pathway bridging cell-wall stress to competence  
113 activation.

114

## 115 **RESULTS**

### 116 **Screening for spontaneous transformation by genome-wide CRISPRi inhibition**

117 To identify unknown modulators of competence in *S. salivarius* HSISS4 (37), we set up a  
118 genome-wide CRISPRi strategy. To design gRNAs on the whole genome of HSISS4, we subset  
119 all the 20 nt sequences followed by a protospacer adjacent motif (PAM, NGG sequence) and  
120 retained only gRNAs binding the coding strand (non-template strand) of coding sequences  
121 (CDSs) and both strands in intergenic regions (34). We ended up with a total of 83,103 gRNAs  
122 (Table S1A) that were introduced under the control of a constitutive promoter ( $P_3$ , (38)) at a  
123 neutral chromosomal locus. The random chromosomal distribution of gRNAs in the library was  
124 preliminary evaluated by the direct sequencing of 40 individual clones (Fig. S1A).

125 The transfer of the library was initially performed in a strain carrying an IPTG-inducible dCas9  
126 ( $P_{F6-lacI}$ ;  $P_{lac-dcas9}$ , (35)), which was previously validated for generating CRISPRi conditional  
127 mutants (7) (Fig. 1). To evaluate the functionality of the library, this first strain was screened  
128 for the activation of spontaneous natural transformation. We hypothesized that dCas9-mediated  
129 repression of genes involved in competence inhibition (i.e. antagonist genes) will result in  
130 spontaneous natural transformation and donor DNA integration. We activated the interference  
131 library by adding IPTG (dCas9 activation) to a liquid culture supplemented with donor DNA  
132 containing a chloramphenicol resistance cassette (Fig. 1A). We were able to isolate 16  
133 candidates after 3 independent rounds of selection, all harboring a different gRNA (Table 1).  
134 In order to confirm the phenotype generated by these gRNAs, we back-transformed them  
135 individually into the original strain and assessed their transformability. Spontaneous  
136 transformation was confirmed for 10 candidates (Table 1). Importantly, this functional screen  
137 succeeded to identify two previously described negative effectors of competence acting on  
138 ComX or XIP stability (*clpC* and *pepF*, respectively) (39, 40).

## 139 **Screening based on gRNA depletion**

140 This strategy was based on the toxicity of competence overactivation in the strain HSISS4 (16).  
141 We assumed that repression of competence-antagonist genes would produce a fitness cost,  
142 resulting in pool depletion of gRNAs targeting the corresponding genes. To set up this strategy,  
143 a second screening strain was generated by introducing a supplemental construct consisting of  
144 a xylose-inducible *comR* gene ( $P_{xyI2}$ -*comR*), allowing a mild competence activation upon  
145 addition of xylose, a non-metabolizable sugar in *S. salivarius* (7) (Fig. 1B). After introducing  
146 the gRNA library into this strain, we spread it on three different solid culture conditions. The  
147 first condition without any inducer was used as control (mock). The second condition was  
148 induced with IPTG alone to activate the CRISPRi library (Ci) and the third condition was  
149 supplemented with IPTG and xylose to concomitantly activate the CRISPRi library and  
150 competence (Ci+C). We hypothesized that we could identify modulator genes of competence  
151 by comparing the depletion of gRNAs between conditions Ci and Ci+C. To this aim, we  
152 performed high-throughput next-generation sequencing (NGS) to quantify each gRNA  
153 abundance per condition (Table S1). We first evaluated the randomness and homogeneity of  
154 gRNA distribution without any selection pressure (mock) by visualizing the mapping of the  
155 gRNAs on the genome of HSISS4 (Fig. S1B). Validating our previous Sanger-sequencing data  
156 (Fig. S1A), we showed that 99.7% (82,864 out of 83,104) of gRNAs were cloned in the non-  
157 induced library with an unbiased distribution (Table S1B and Fig. S1C). We next used the  
158 MAGeCK algorithm (41) to compare depletion of gRNAs between two conditions. As  
159 expected, the analysis of gRNA depletion between Ci and mock conditions uncovered well-  
160 known essential genes in streptococci (Table S2, Fig. S2A), as well as competence-related  
161 genes (e.g. *covR*, *pepF*) whose inactivation was recently shown to be lethal in strain HSISS4  
162 (7, 40). We next performed the same analysis for the comparison of condition Ci+C with the  
163 mock (Table S3, Fig. S2B) and plotted against each other the two scores obtained from the two



164 comparisons (i.e. Ci vs mock and Ci+C vs mock) (Fig. S3). As expected, depletion scores in  
165 the two comparisons displayed a high correlation showing that gene fitness (i.e. positive, neutral  
166 or negative) was conserved with or without competence activation (linear regression of  
167  $R^2=0.97$ ). However, several outliers were present. Because they represent genes differentially  
168 affected in-between two conditions, we analyzed the standardized residuals of the linear  
169 regression (Fig. 2A, Table S4). We set up an arbitrary cut-off at +2.5 and -2.5 to identify the  
170 most representative outliers. Several depleted gRNAs were found as targeting genes known as  
171 competence antagonists such as the *mecA* gene encoding the ComX adaptor of the Clp  
172 degradation machinery (standardized residuals  $< -2.5$ , Table 2) (42). Unexpectedly, many  
173 crucial genes for competence activation (*comR*, *amiACDEF*) or competence-based bacteriocin  
174 production/immunity (e.g. *slvX-HSISS4\_01664* operon) also showed gRNA depletion (Table 2)  
175 (16). In the strain HSISS4, competence, bacteriocins, and bacteriocin-immunity genes are  
176 concomitantly activated through ComR (16). Therefore, those genes might have been selected  
177 because a reduced competence activation goes along with a lower immunity rate toward  
178 bacteriocins, ultimately leading to a high fitness cost. Indeed, since bacteriocin producers are  
179 present at high cell density on plates due to xylose-mediated competence activation, non-  
180 competent and immunity-deficient cells will be killed through the well-established fratricide  
181 process (43).

## 182 **Screening based on $\beta$ -galactosidase activity**

183 The last screening strategy was based on  $\beta$ -galactosidase ( $\beta$ -Gal) activity that allows the  
184 colorimetric evaluation of competence activation level in individual clones on plates with low  
185 selective pressure. For this purpose, a strain was generated by plugging the promoter of *comX*  
186 in front of the native *lacZ* gene ( $P_{comX}$ -*lacZ*) together with a  $P_{comX}$  luciferase reporter system  
187 ( $P_{comX}$ -*luxAB*) into the dCas9 and xylose-inducible competence strain (Fig. 1C). We  
188 transformed the gRNA library into this genetic background and spread it onto M17GL plates

189 supplemented with IPTG, xylose, and X-gal for detection of  $\beta$ -Gal activity. We examined  
190 ~94,000 isolated colonies, searching for white and dark blue phenotypes. While white  
191 phenotype is associated to targeted genes required for competence activation, dark blue  
192 phenotype is related to targeted genes repressing competence development. We next re-isolated  
193 the selected colonies to confirm their phenotypes and ended up with 141 dark blue and 68 white  
194 clones. We sequenced their gRNAs to identify the interference target and quantified their  
195 inhibition effects on  $P_{comX}$  activation thanks to the  $P_{comX}$ -*luxAB* module present in the strain. To  
196 this aim, we slightly overexpressed *comR* with xylose thanks to the  $P_{xyl2}$ -*comR* module and  
197 induced the gRNA-based inhibition system by adding IPTG. We compared the specific  
198 luciferase activity of all the selected clones to the initial strain harboring no gRNA. The  
199 sequence of the gRNAs, their identified targets, and their fold-changes in  $P_{comX}$  activation are  
200 displayed in Table S5.

201 Since both frequency of selected gRNAs targeting the same gene and fold-change in  $P_{comX}$   
202 activation were relevant features to identify new competence regulators, we combined those  
203 two parameters in the same analysis. On one hand, we calculated the mean fold-change in  $P_{comX}$   
204 activation for all gRNAs targeting the same gene. On the other hand, we counted the number  
205 of selected gRNAs targeting the same gene. In addition, we normalized the count by the total  
206 expected number of gRNAs of the library targeting each defined gene to avoid any gene-size  
207 bias (higher probability to encounter a gRNA targeting a high-size gene) (Table S6). We plotted  
208 those two variables (activation fold-change vs normalized gRNA frequency) and validated the  
209 screen by finding most of the proximal effectors of the ComRS system, i.e. *comR*, *amiACDEF*,  
210 *clpC* and  $P_{comX}$  (Fig. 2B and Table S6) (7, 16, 42). We next applied an arbitrary cut-off  
211 (normalized count > 0.02 and  $\log_2(\text{FC}) > 0.5$ ) to find the most significant genes with an  
212 antagonist function towards competence (Table 3). We thereby selected several players whose  
213 role in competence inhibition was also suggested with the gRNA depletion screen, such as the

214 phosphate transporter system (*pstCI*) and the serine-threonine kinase (*stkP*) genes. Strikingly,  
215 the mannose/glucosamine PTS transporter operon (*manLMN*) was particularly overrepresented,  
216 even though absent from the two previous screens. This result might be an artefactual  
217 consequence of a carbon metabolism shift enhancing xylose uptake ultimately resulting in  
218 higher *comR* induction, but could also be due to a link between mannose catabolism and  
219 competence as reported in *S. mutans* (30).

## 220 **Cell-wall integrity is a signal for competence**

221 Since many genes were identified to affect competence by the three screening approaches, we  
222 used the Clusters of Orthologous Genes (COG) database (44) to classify them by general  
223 function. For this analysis, we selected only the genes whose inhibition is expected to induce  
224 competence (i.e. all the genes from the transformation screen, genes with standardized residuals  
225  $< -2.5$  from the growth screen, and genes with  $\log_2(\text{FC}) > 0.5$  and normalized count  $> 0.02$  from  
226 the colorimetric screen). We next assessed the importance of the different pathways for  
227 competence activation. For this purpose, we counted the number of genes per screen involved  
228 in one COG function and normalized it by the total number of genes within this COG function  
229 in the HSISS4 genome (Fig. 3A). This analysis indicated that the most represented function  
230 was cell wall/membrane/envelope biogenesis (23% of all the genes highlighted vs ~5% at the  
231 whole genome level). Furthermore, we observed that overlapping genes between gRNA  
232 depletion and  $\beta$ -Gal screens were all directly or indirectly involved in cell-envelope assembly.  
233 Indeed, we identified in both screens the *dltA* and *dltB* genes involved in teichoic acid D-  
234 alanylation (45), the phosphoglucomutase *pgmA* gene involved in the biosynthesis of  
235 extracellular polysaccharides (46), the cell wall-related serine-threonine kinase *stkP* gene (47,  
236 48), and the phosphate transporter *pstCI* gene with an important role for  
237 poly(glycerophosphate) teichoic acid synthesis (49) (Fig. 3B).

238 We next drew a more precise view of the different cell wall pathways targeted by gRNA that  
239 presumably lead to competence activation. We found that genes involved in the synthesis of  
240 peptidoglycan, teichoic acids, and extracellular polysaccharides were all affected (Fig. 4). In  
241 parallel, key sensors (StkP, LiaFSR) or mediators (SpxA1) known to be triggered by cell wall  
242 alterations were also identified in the screens (24, 50-54), suggesting a possible link between  
243 cell wall integrity and ComRS activation.

#### 244 **StkP controls *comX* expression through muropeptide binding**

245 Since StkP was highlighted in two screens with multiple different gRNAs and is cell wall-  
246 associated, we decided to further investigate its link with competence activation. Serine-  
247 threonine kinases are pleiotropic regulators that control key cellular processes such as  
248 dormancy, virulence, cell division, and cell wall synthesis through protein phosphorylation (47,  
249 48). In *S. salivarius*, only one serine-threonine kinase homolog is present and displays PASTA  
250 motifs shown to bind muropeptides in *Bacillus subtilis* (55). Besides, StkP of *S. pneumoniae*  
251 has been shown to coordinate cell wall synthesis and septation (24, 56-58) while an unclear link  
252 with competence has been suggested in *S. mutans* and *S. pneumoniae* (19, 23, 24).

253 In a first set of experiments, we transferred a gRNA targeting *stkP* in a strain harboring the  
254 dCas9 module ( $P_{F6-lacI} P_{lac-dcas9}$ ) together with a luciferase reporter of the transcriptional  
255 activity of *comR* ( $P_{comR-luxAB}$ ) or *comX* ( $P_{comX-luxAB}$ ) and the xylose-inducible module  
256 allowing competence activation ( $P_{xyI2-comR}$ ). Monitoring activation of those two promoters  
257 with or without *stkP* inhibition suggested that StkP level influences *comX* expression but has  
258 no impact on *comR* transcription (Fig. 5A). We next used the same *comX* reporter strain with  
259 increasing xylose concentrations for *comR* induction and measured  $P_{comX}$  activation with or  
260 without *stkP* inhibition (Fig. 5B). Stronger inhibitions of *stkP* were recorded for lower ComR  
261 levels, suggesting that ComR overproduction interferes with the StkP-mediated regulation of  
262 *comX*.

263 Since StkP was shown to bind specific muropeptides via its PASTA domains (55), we  
264 investigated if the addition of peptidoglycan extracts was able to modulate competence. To this  
265 aim, we purified peptidoglycan from *S. salivarius* (L-Lys pentapeptide) or *B. subtilis* (Meso-  
266 DAP pentapeptide) and measured the activation of the  $P_{comX}$ -*luxAB* reporter strain with (-| *stkP*)  
267 or without (mock) dCas9 interference on *stkP* expression (Fig. 5C). While *S. salivarius*  
268 peptidoglycan could decrease  $P_{comX}$  activation, *B. subtilis* extracts (negative control) did not  
269 result in a significant reduction. Moreover, adding peptidoglycan from *S. salivarius* prevented  
270  $P_{comX}$  repression when *stkP* was inhibited, suggesting that StkP mediates the signalization (Fig.  
271 5D).

272 Altogether, these results suggest that StkP interferes with the transcriptional activity of the  
273 ComR•XIP complex by an unknown mechanism, which is modulated by the binding of specific  
274 muropeptides.

275

## 276 **DISCUSSION**

277 How QS modules integrate multiple inputs to fine-tune their sensitivity and optimize collective  
278 behavior is a challenging topic. In this work, we performed a genome-wide screen coupled to  
279 three different readouts to uncover key triggers of ComRS-mediated competence activation.  
280 Using a conditional mutant library, we highlighted a connection between cell wall biogenesis  
281 and competence activation. Moreover, we uncovered a link between muropeptide sensing via  
282 the serine threonine StkP and competence development. Those pieces of evidence suggest a key  
283 role of cell wall stress on the competence response (Fig. 6).

284 To discover novel players involved in competence regulation, we built a CRISPRi-based library  
285 and performed three types of screen in parallel. The interference technology offers several  
286 advantages over the classical random transposon mutagenesis (59) but the primary one is the  
287 production of conditional mutants allowing the study of essential/deleterious genes.  
288 Considering the transformation screen, the library was transiently induced, dampening the  
289 toxic-acquired phenotype due to constitutive activation of natural transformation. This strategy  
290 provided a direct screening method for DNA integration and allowed us to select gRNAs  
291 targeting essential genes among which *pepF*, a gene essential for competence shut-off recently  
292 discovered in *S. salivarius* (40). In addition, we also selected two different gRNAs targeting  
293 *clpC*, a gene encoding a component of the MecA-ClpCP machinery responsible for ComX  
294 degradation (39, 60). Those results confirm the roles of PepF and ClpC to prevent spontaneous  
295 competence activation at the early and late stage of competence, respectively (40, 42, 60).  
296 Moreover, novel competence modulators were identified such as a putative bactoprenol  
297 glucosyltransferase and 3 hypothetical proteins. Specifically, interference on the putative  
298 bactoprenol glucosyltransferase resulted in a high transformation rate ( $\sim 10^{-2}$ , Table 1),  
299 suggesting an important role of this player for competence control. Although the transformation  
300 screen displays interesting features to select essential genes connected to competence

301 development, it would require a massive number of cells to ensure a complete coverage of the  
302 high-density gRNA library. This issue is not present in the gRNA depletion screen, where high-  
303 throughput NGS is exploited to map and quantify all the gRNAs, generating a complete picture  
304 at the genome scale. Nevertheless, the identification of the genes is based on the competence-  
305 related toxic phenotype. This feature could limit the detection of essential genes whose  
306 inhibition has a high fitness cost. Of note, the competence-associated toxicity used in the gRNA  
307 depletion screen could explain some intriguing results. While NGS data showed a depletion of  
308 gRNAs targeting genes involved in the downregulation of competence such as *mecA*, the  
309 depletion of gRNAs targeting crucial genes for competence activation (e.g. *comR* or the  
310 *ami/opp* operon) was counterintuitive. To reconcile these findings, we reasoned that a lack of  
311 functional competence goes along with an impairment in bacteriocin immunity. Consequently,  
312 the gRNA depletion will also include bacteriocin/immunity loci and key players required for  
313 competence activation (Table 2 and Table S3). Finally, as the colorimetric  $\beta$ -gal test is based  
314 on  $P_{comX}$  activity and visual selection, this screen drastically reduces any fitness bias. To sum  
315 up, this work highlights the added value of combining different screening approaches to unveil  
316 the largest set of candidate genes connected to competence control.

317 The three screens converge to select gRNAs involved in key envelope biogenesis processes and  
318 its control by cell wall sensors (Fig. 4). The connection between cell wall and competence has  
319 only been reported in a similar experiment with Tn-seq in *S. mutans* (61). However, the authors  
320 report that inactivation by transposon insertion of the cell wall related genes *pknB* (homolog of  
321 *stkP*), *rgpL*, *dltA* and *liaS* results in a lower activation of competence, contrasting with the  
322 results obtained in this study. Opposite effects of competence regulators in *S. salivarius* and *S.*  
323 *mutans* have already been reported for the CovRS system (7, 62) and showcase that species  
324 have evolved control mechanisms in line with their own lifestyles. Aside from the cell wall  
325 synthesis, several other pathways were highlighted (Fig. 6). One of them is translation, with

326 several important players targeted (rRNAs, tRNAs, peptide chain release factor, ribosomal  
327 proteins, and tRNA synthetases). This correlation is interesting in the light of the work of  
328 Stevens and coworkers, who showed that translation fidelity impairment promotes competence  
329 activation in *S. pneumoniae* (63). In addition, important genes involved in chromosome  
330 replication/segregation (*priA*, *cshA/rarA*, *scpB*) and DNA repair (*mutL*, *mutT*, *dinP*) were also  
331 underlined by the screens (Table 3, Tables S4 and S6). Replication stress was previously shown  
332 to induce pneumococcal competence, but the exact mechanism remains unclear and involves  
333 *comCDE* gene dosage control and/or a role for arrested and unrepaired replication forks (64,  
334 65). The screens did highlight a role for enzymes or transporters involved in amino acid  
335 biosynthesis or uptake for arginine (CarB and ArgJ), glutamine (GlnP), glutamate  
336 (HSISS4\_00833 and 00832) and leucine (LivJ). Amino acid starvation is known to trigger the  
337 stringent response via RelA and the production of (p)ppGpp alarmones (66), which was shown  
338 to influence competence regulation in *S. mutans* (67). Altogether, the screens performed here  
339 suggest that *S. salivarius* competence control relies on the sensing of various alterations of key  
340 metabolic/physiological functions, reinforcing the view that competence activation could be  
341 seen as a general stress response in streptococci.

342 In this work, we specifically investigate StkP, a key sensor of cell wall integrity in *S.*  
343 *pneumoniae* (54). In streptococci, StkP was also shown to phosphorylate classical response  
344 regulators of two-component systems such as the virulence regulator CovR in *Streptococcus*  
345 *agalactiae* and *Streptococcus pyogenes* (68, 69), the cell wall regulator VicR in *S. mutans* and  
346 *S. pneumoniae* (24, 54), and the competence regulator ComE in *S. pneumoniae* for which StkP  
347 phosphorylation triggers a distinct regulon from the aspartate phospho-transfer mediated by  
348 ComD (22). The pleiotropic effects of StkP and its involvement in major cellular processes is  
349 probably the reason why its impact on competence has been reported but remains controversial  
350 in *S. pneumoniae* (19, 22, 23). In *S. salivarius*, we showed that *stkP* depletion promotes a higher



351 *comX* activation without major effect on *comR* expression. This suggests a mechanism acting  
352 directly on the ComR sensor by increasing its trans-activator properties. This hypothesis is  
353 strengthened by the fact that ComR overexpression curtails the effect of StkP on *comX*  
354 activation (Fig. 5B). The exact process remains to be discovered, even if it suggests a direct  
355 effect of StkP on ComR. Two non-exclusive mechanisms could explain the control of  
356 competence by StkP in *S. salivarius*. On one hand, the kinase could sense directly or indirectly  
357 a disfunction in the cell wall synthesis. Beside a direct effect on ComR, this impairment could  
358 also be transmitted to other cell wall sensors. Interestingly, two of these sensor systems (i.e.  
359 VicRK and LiaSRF) were highlighted in the  $\beta$ -gal screen (Tables 3 and S5) and were previously  
360 shown to affect competence activation in *S. salivarius* (Fig. 6) (7). On the other hand, the kinase  
361 could also control competence as a muropeptide signaling system. Our experiments with  
362 peptidoglycan extracts (Fig. 5C and D) advocate for this possibility as a high concentration of  
363 self-muropeptides inhibits competence in a StkP-dependent manner. In line with this,  
364 competence in streptococci is transiently activated during the early exponential growth but  
365 could not be triggered in stationary phase when the extracellular muropeptide concentration is  
366 expected to be high (14, 16, 70). This may suggest that StkP acts as a growth phase sensor to  
367 extinct competence at high cell density (Fig. 6).

368 To conclude, we showed the large potential of combining a genome-wide CRISPRi strategy  
369 with multiple screening approaches to connect essential genes involved in physiological  
370 pathways to competence development. Besides the well-established ComRS-ComX regulatory  
371 pathway, we revealed that disturbance of general functions such as cell envelope assembly,  
372 amino-acid metabolism, translation, and replication modulates competence activation in *S.*  
373 *salivarius*. This work strengthens our view that competence is a general adaptative response  
374 that ensures survival in a broad range of stress conditions. Moreover, the identification of a  
375 large set of “competence-associated” genes paves the way to understand novel regulatory

376 cascades interconnecting cell-proliferation impairment and competence activation such as  
377 illustrated here for the role of the serine/threonine kinase StkP in cell wall-mediated competence  
378 modulation.

## 379 **MATERIALS AND METHODS**

### 380 **Bacterial strains, plasmids, sgRNA and oligonucleotides**

381 Bacterial strains, plasmids, sgRNA and oligonucleotides used in this study are listed and  
382 described in supplemental material (Tables S7A-D).

### 383 **Growth conditions and competence induction**

384 *S. salivarius* HSISS4 (71) and derivatives were grown at 37°C without shaking in M17 (Difco  
385 Laboratories, Detroit, MI) or in chemically-defined medium (CDM) (72) supplemented with  
386 1% (w/v) glucose (M17G, CDMG, respectively). Chromosomal genetic constructions were  
387 introduced in *S. salivarius* via natural transformation (73). We added D-xylose (0.1 to 1%; w/v),  
388 IPTG (1 mM), spectinomycin (200 µg/ml), chloramphenicol (5 µg/ml) or erythromycin (10  
389 µg/ml), as required. The synthetic peptides (purity of 95%), were supplied by Peptide 2.0 Inc.  
390 (Chantilly, VA) and resuspended first in dimethyl-formamide (DMF) and diluted in water to  
391 reach low DMF concentration (final of 0.02%). Solid plates inoculated with streptococci cells  
392 were incubated anaerobically (BBL GasPak systems, Becton Dickinson, Franklin lakes, NJ) at  
393 37°C.

394 To induce competence, overnight CDMG precultures were diluted at a final OD<sub>600</sub> of 0.05 in  
395 500 µl of fresh CDMG and incubated 100 min at 37°C. Then, the pheromone sXIP  
396 (LPYFAGCL) and DNA (Gibson assembled PCR products or plasmids) were added and cells  
397 were incubated for 3 h at 37°C before plating on M17G agar supplemented with antibiotics  
398 when required.

### 399 **Library design and construction**

400 The gRNA library was designed by selecting all the 20 nt followed by a PAM sequence within  
401 the genome of HSISS4. Since it was shown that efficient interference in CDSs occurs only with  
402 gRNAs targeting the coding strand (34), we filtered the library to keep only gRNAs targeting  
403 the coding strand in CDSs and targeting both strands in intergenic regions. We ended up with

404 a high-density library of 83,104 gRNAs resulting in a theoretical base pairing every 25 pb on  
405 the HSISS4 genome. Of note, we chose to use a high-density library to target unknown small  
406 genetic elements such as siRNA or small peptides. We ordered the gRNAs as single strand  
407 DNA (Twist BioSciences) and amplified the oligo-pool thanks to common upstream and  
408 downstream region using primers AK475 and AK476. To reduce any amplification sequence-  
409 bias, we used 10 cycles of amplification.

410 The PCR products were then purified (Monarch kit, NEB) and Gibson-joined to the pre-  
411 amplified upstream homologous region of the neutral locus *gor* (downstream of  
412 *HSISS4\_00325*) containing an erythromycin resistance gene and to the downstream  
413 homologous region of the same locus fused to a P<sub>3</sub> constitutive promoter. We performed 20  
414 independent Gibson assemblies, which were latter transformed by natural transformation into  
415 20 independent cultures of HSISS4 strains containing at least a lactose-inducible dCas9 module  
416 (P<sub>F6</sub>-*lacI*; P<sub>lac</sub>-*dcas9*) (7). Supplemental genetic constructions (P<sub>xy12</sub>-*comR*, P<sub>comX</sub>-*lacZ*, P<sub>comX</sub>-  
417 *luxAB*) were present in those strains depending on the screening strategy. For every library  
418 produced, we calculated the number of transformants to obtain at least 15-fold transformants  
419 over the diversity rate, ensuring theoretically that 99,9% of the diversity would be present in  
420 the library (74). We finally pooled all the transformants in Phosphate Buffered Saline (PBS,  
421 137 mM NaCl, 2.7 mM KCl, 10 mM Na<sub>2</sub>HPO<sub>4</sub>, 1.8 mM KH<sub>2</sub>PO<sub>4</sub>) and measured OD<sub>600</sub> prior  
422 to storage at -80°C.

### 423 **CRISPRi transformation screen**

424 For the spontaneous transformation screen, we first introduced the gRNA library in the lactose-  
425 inducible strain harboring a P<sub>comX</sub> luciferase reporter system (P<sub>F6</sub>-*lacI*, P<sub>lac</sub>-*dcas9*, P<sub>comX</sub>-*luxAB*).  
426 We next diluted the cells in 15 ml of fresh CDMG supplemented with IPTG 1 mM at an OD<sub>600</sub>  
427 of 0.01. We grew this culture at 37°C for 8 h and added every 30 min a PCR-amplified product  
428 consisting of a chloramphenicol cassette with 2000-pb up and down homologous recombination

429 arms at a final concentration of 0.25 nM. We centrifugated this culture, plated it on  
430 chloramphenicol plates and grew it overnight. Colonies were picked and donor DNA  
431 integration was confirmed by PCR. We next amplified the locus containing the gRNAs before  
432 Sanger sequencing.

### 433 **CRISPRi gRNA depletion screen**

434 For the gRNA depletion analysis, we used the same strain as described in the previous section.  
435 After introducing the gRNAs in this background, we spread the resulting library onto three  
436 different solid media (M17G; M17G IPTG 100  $\mu$ M; M17G IPTG 100  $\mu$ M xylose 1%) resulting  
437 in an average of  $9.6 \times 10^6$  CFU per large plate. Technical replicates ( $n = 4$ ) were incubated 16  
438 h at 37°C to yield an estimated mean of ~12 generations. Cells were then collected, pooled in  
439 PBS buffer and homogenized for each replicate. After genomic extraction (GenElute, Sigma  
440 Aldrich) from at least  $1.5 \times 10^9$  CFU per replicate, we PCR-amplified the locus containing the  
441 gRNAs prior to their deep sequencing. We used an optimized PCR protocol with high primer  
442 concentration (5  $\mu$ M), low template genomic DNA (2 ng/ $\mu$ l), and low number of cycles (15  
443 cycles) to avoid any chimeric products due to the highly randomized gRNA sequences. The  
444 219-pb amplicons were next gel-purified (Monarch DNA Gel Extraction kit, NEB) and sent  
445 with a minimum amount of 4 pmol for Illumina sequencing (GeneWiz). High-Seq Illumina  
446 sequencing was performed with 30% Phix and generated an average of 30 M reads per replicate.  
447 All gRNA sequencing data was deposited in the GEO database under accession number  
448 GSE204976.

### 449 **CRISPRi $\beta$ -galactosidase activity screen**

450 We first produced a new genetic background by introducing into the strain described in the  
451 previous section an ectopic copy of *comR* under the control of a xylose-inducible promoter  
452 ( $P_{xyI2-comR}$ ) together with a chloramphenicol resistance cassette at the neutral locus *suc*  
453 (upstream of *HSISS4\_01641*). We next fused the promoter of *comX* to the native *lacZ* gene

454 (*P<sub>comX</sub>-lacZ*) together with a spectinomycin resistance cassette and introduced the gRNA library  
455 into this strain. The resulting library was spread on M17 0.5% glucose, 0.5% lactose (M17GL),  
456 IPTG 100  $\mu$ M, xylose 1%, and X-gal 100 mg/ml for screening dark-blue (highly competent)  
457 and white (competence loss) colonies. A total of 158 dark blue and 155 white clones from the  
458 screening of ~94,000 colonies were re-isolated for phenotype confirmation. Luciferase tests  
459 (*P<sub>comX</sub>-luxAB*) were performed in comparison with the parental strain harboring no gRNA.  
460 Clones with the most dissimilar luciferase phenotypes (141 dark blue and 68 white clones) were  
461 selected and gRNAs were amplified by PCR for Sanger-sequencing.

#### 462 **NGS analysis**

463 We used the MAGeCK algorithm to map the reads on the HSISS4 genome (41).  
464 Approximately 30% of total reads were mapped, producing about 10 M reads per replicate.  
465 Following the MAGeCK guidelines, we next pooled the reads from the 4 replicates, ultimately  
466 generating a total of 40 M reads per condition. In a first analysis, we compared the gRNA  
467 depletion in the IPTG-induced condition with the mock to determine all the essential genes  
468 from strain HSISS4. For the sake of clarity, we only compared gRNAs targeting CDSs, since  
469 gRNAs targeting intergenic regions are much more complicated to determine. We next  
470 compared the depletion of gRNAs for each gene in the IPTG- and IPTG-xylose-induced  
471 conditions to the mock condition thanks to the MAGeCK algorithm. The depletion scores  
472 generated per gene for the two induced conditions were then plotted against each other and a  
473 linear regression was fitted to the plot (*lm* function, R package) and outliers were identified by  
474 standardizing the residuals.

#### 475 **COG analysis**

476 The conserved domain database of NCBI was used to infer functions of the genes from the  
477 genome of HSISS4 (44, 75) and only the highest scored function for each gene were retained.  
478 The number of genes of the whole genome involved in each function prediction was then

479 calculated, generating a function prediction frequency matrix. This matrix was then used to  
480 weight the number of genes with a specific predicted function highlighted in the different  
481 screens.

#### 482 **Luciferase assay**

483 Overnight precultures were diluted at a final OD<sub>600</sub> of 0.05. A volume of 300 µl of culture was  
484 transferred in the wells of a sterile covered white microplate with a transparent bottom (Greiner,  
485 Alphen a/d Rijn, The Netherlands). These culture samples were supplemented with D-xylose,  
486 IPTG or peptidoglycan extracts if stated. Growth (OD<sub>600</sub>) and luciferase (Lux) activity  
487 (expressed in relative light units, RLU) were monitored at 10 min intervals during 8 to 24 h in  
488 a Hidex Sense microplate reader (Hidex, Lemminkäisenkatu, Finland). Specific Lux activity  
489 were obtained by dividing Lux activity by the OD<sub>600</sub> and summing all the data obtained over  
490 time. When stated, biological or technical triplicates were averaged. Statistical analyses of  
491 simple and multiple comparisons to the control mean were performed with *t*-test (unilateral  
492 distribution, heteroscedastic) and one-way ANOVA with Dunnett's test, respectively. For both,  
493 standard deviations and *P* values were calculated.

#### 494 **Transformation test**

495 The CDMG preculture of HSISS4 and derivatives was diluted in 500 µl of CDMG  
496 supplemented with 1 mM IPTG at an OD<sub>600</sub> of 0.005. The culture was grown at 37°C for 8 h  
497 and we added every 30 min a PCR-amplified product consisting of a chloramphenicol resistance  
498 cassette surrounded by up and down homologous recombination arms (2000 pb each) at a final  
499 concentration of 0.25 nM. We next performed serial dilution of the culture and spread the  
500 various dilutions on M17G plates supplemented with or without chloramphenicol 5 µg/ml. We  
501 next calculated the transformation rate based on the CFU numbers of the two plates.

#### 502 **Peptidoglycan extracts**

503 Peptidoglycan extracts were prepared as previously reported (55). Cultures of 100 ml of *S.*  
504 *salivarius* HSISS4 or *B. subtilis* 168 were grown to an OD<sub>600</sub> of ~1.2 in M17 or LB media,  
505 respectively. Cells were collected by centrifugation, washed with 0.8% NaCl, resuspended in  
506 hot 4% SDS, boiled for 30 min, and incubated at room temperature overnight. The suspension  
507 was then boiled for 10 min and the SDS-insoluble cell-wall material was collected by  
508 centrifugation at 12,000 *g* for 15 min at room temperature. The pellet-containing cell wall  
509 peptidoglycan was washed four times with water and finally resuspended in 1 ml sterile water.  
510 The resuspended peptidoglycan was next digested with mutanolysin (10 µg/ml) overnight at  
511 37°C prior to inactivation of mutanolysin at 80°C for 20 min.

## 512 **ACKNOWLEDGEMENTS**

513 The work of PH was supported by the Belgian National Fund for Scientific Research (FNRS,  
514 grant PDR T.0110.18) and the Concerted Research Actions (ARC, grant 17/22-084) from  
515 Federation Wallonia-Brussels. AK held a doctoral fellowship from FNRS (FRIA fellowship).  
516 PH is Research Director at FNRS. The funders had no role in study design, data collection and  
517 interpretation, or the decision to submit the work for publication.

518 We thank Marcello Mora for its advices on non-specific DNA amplification.

## 519 **AUTHOR CONTRIBUTIONS**

520 AK and PH conceived and designed the study. AK, AW, ML, BD, and JM carried the laboratory  
521 work. AK, JWV, JM and PH analyzed and interpreted the data. AK, JWV, JM and PH wrote  
522 and revised the manuscript. All authors read and approved the final manuscript.

## 523 **COMPETING INTERESTS**

524 The authors declare no conflict of interest.

525



526 **SUPPLEMENTAL MATERIAL**

527

528 **Supplementary Figures:**

529 **Figure S1. Random chromosomal distribution of the gRNA library**

530 **Figure S2. Gene-associated gRNA depletion scores**

531 **Figure S3. Linear regression of gene-associated gRNA depletion scores**

532

533 **Supplementary Tables:**

534 **Table S1. List of oligonucleotides used for the genome-wide CRISPRi strategy**

535 (separate .xls file)

536 **Table S2. List of gene-associated gRNA depletion scores from library activation**

537 (separate .xls file)

538 **Table S3. List of gene-associated gRNA depletion scores from library and competence  
539 activation**

540 (separate .xls file)

541 **Table S4. List of competence-associated genes (standardized residuals) from the gRNA  
542 depletion screen**

543 (separate .xls file)

544 **Table S5. List of gRNA and their targeted genes from the  $\beta$ -Gal screen**

545 (separate .xls file)

546 **Table S6. List of normalized competence-associated genes from the  $\beta$ -Gal screen**

547 (separate .xls file)

548 **Table S7. List of bacterial strains (A), plasmids (B), oligonucleotides (C), and PCR  
549 fragments (D) used in this study**

550

551

552 **REFERENCES**

553

554 1. Huang R, Li M, Gregory RL. 2011. Bacterial interactions in dental biofilm. *Virulence*  
555 2:435-444.

556 2. Huttenhower C, Gevers D, Knight R, Abubucker S, Badger JH, Chinwalla AT, Creasy  
557 HH, et al. 2012. Structure, function and diversity of the healthy human microbiome.  
558 *Nature* 486:207-214.

559 3. Kommineni S, Bretl DJ, Lam V, Chakraborty R, Hayward M, Simpson P, Cao Y,  
560 Bousounis P, Kristich CJ, Salzman NH. 2015. Bacteriocin production augments niche  
561 competition by enterococci in the mammalian gastrointestinal tract. *Nature* 526:719-  
562 722.

563 4. Bettenworth V, Steinfeld B, Duin H, Petersen K, Streit WR, Bischofs I, Becker A. 2019.  
564 Phenotypic Heterogeneity in Bacterial Quorum Sensing Systems. *J Mol Biol* 431:4530-  
565 4546.

566 5. Doganer BA, Yan LKQ, Youk H. 2016. Autocrine Signaling and Quorum Sensing:  
567 Extreme Ends of a Common Spectrum. *Trends Cell Biol* 26:262-271.

568 6. Domenech A, Slager J, Veening JW. 2018. Antibiotic-Induced Cell Chaining Triggers  
569 Pneumococcal Competence by Reshaping Quorum Sensing to Autocrine-Like  
570 Signaling. *Cell Rep* 25:2390-2400.

571 7. Knoops A, Vande CF, Fontaine L, Verhaegen M, Mignolet J, Goffin P, Mahillon J, Sass  
572 A, Coenye T, Ledesma-Garcia L, Hols P. 2022. The CovRS Environmental Sensor  
573 Directly Controls the ComRS Signaling System To Orchestrate Competence Bimodality  
574 in *Salivarius Streptococci*. *mBio* 13:e0312521.

575 8. Chang JC, Jimenez JC, Federle MJ. 2015. Induction of a quorum sensing pathway by  
576 environmental signals enhances group A streptococcal resistance to lysozyme. *Mol*  
577 *Microbiol* 97:1097-1113.

578 9. Moreno-Gamez S, Sorg RA, Domenech A, Kjos M, Weissing FJ, van Doorn GS,  
579 Veening JW. 2017. Quorum sensing integrates environmental cues, cell density and cell  
580 history to control bacterial competence. *Nat Commun* 8:854.

581 10. Neiditch MB, Capodagli GC, Prehna G, Federle MJ. 2017. Genetic and Structural  
582 Analyses of RRNPP Intercellular Peptide Signaling of Gram-Positive Bacteria. *Annu*  
583 *Rev Genet* 51:311-333.

584 11. Fontaine L, Wahl A, Flechard M, Mignolet J, Hols P. 2015. Regulation of competence  
585 for natural transformation in streptococci. *Infect Genet Evol* 33:343-360.

586 12. Shanker E, Federle MJ. 2017. Quorum Sensing Regulation of Competence and  
587 Bacteriocins in *Streptococcus pneumoniae* and *mutans*. *Genes (Basel)* 8:15.

588 13. Fontaine L, Boutry C, de Frahan MH, Delplace B, Fremaux C, Horvath P, Boyaval P,  
589 Hols P. 2010. A novel pheromone quorum-sensing system controls the development of

- 590 natural competence in *Streptococcus thermophilus* and *Streptococcus salivarius*. *J*  
591 *Bacteriol* 192:1444-1454.
- 592 14. Gardan R, Besset C, Gitton C, Guillot A, Fontaine L, Hols P, Monnet V. 2013.  
593 Extracellular life cycle of ComS, the competence-stimulating peptide of *Streptococcus*  
594 *thermophilus*. *J Bacteriol* 195:1845-1855.
- 595 15. Fontaine L, Goffin P, Dubout H, Delplace B, Baulard A, Lecat-Guillet N, Chambellon  
596 E, Gardan R, Hols P. 2013. Mechanism of competence activation by the ComRS  
597 signalling system in streptococci. *Mol Microbiol* 87:1113-1132.
- 598 16. Mignolet J, Fontaine L, Sass A, Nannan C, Mahillon J, Coenye T, Hols P. 2018.  
599 Circuitry Rewiring Directly Couples Competence to Predation in the Gut Dweller  
600 *Streptococcus salivarius*. *Cell Rep* 22:1627-1638.
- 601 17. Talagas A, Fontaine L, Ledesma-Garcia L, Mignolet J, Li de la Sierra-Gallay, Lazar N,  
602 Aumont-Nicaise M, Federle MJ, Prehna G, Hols P, Nessler S. 2016. Structural Insights  
603 into Streptococcal Competence Regulation by the Cell-to-Cell Communication System  
604 ComRS. *PLoS Pathog* 12:e1005980.
- 605 18. Hagen SJ, Son M. 2017. Origins of heterogeneity in *Streptococcus mutans* competence:  
606 interpreting an environment-sensitive signaling pathway. *Phys Biol* 14:015001.
- 607 19. Echenique J, Kadioglu A, Romao S, Andrew PW, Trombe MC. 2004. Protein  
608 serine/threonine kinase StkP positively controls virulence and competence in  
609 *Streptococcus pneumoniae*. *Infect Immun* 72:2434-2437.
- 610 20. Echenique JR, Chapuy-Regaud S, Trombe MC. 2000. Competence regulation by  
611 oxygen in *Streptococcus pneumoniae*: involvement of ciaRH and comCDE. *Mol*  
612 *Microbiol* 36:688-696.
- 613 21. Echenique JR, Trombe MC. 2001. Competence repression under oxygen limitation  
614 through the two-component MicAB signal-transducing system in *Streptococcus*  
615 *pneumoniae* and involvement of the PAS domain of MicB. *J Bacteriol* 183:4599-4608.
- 616 22. Pinas GE, Reinoso-Vizcaino NM, Yandar Barahona NY, Cortes PR, Duran R,  
617 Badapanda C, Rathore A, Bichara DR, Cian MB, Olivero NB, Perez DR, Echenique J.  
618 2018. Crosstalk between the serine/threonine kinase StkP and the response regulator  
619 ComE controls the stress response and intracellular survival of *Streptococcus*  
620 *pneumoniae*. *PLoS Pathog* 14:e1007118.
- 621 23. Saskova L, Novakova L, Basler M, Branny P. 2007. Eukaryotic-type serine/threonine  
622 protein kinase StkP is a global regulator of gene expression in *Streptococcus*  
623 *pneumoniae*. *J Bacteriol* 189:4168-4179.
- 624 24. Banu LD, Conrads G, Rehrauer H, Hussain H, Allan E, van der Ploeg JR. 2010. The  
625 *Streptococcus mutans* serine/threonine kinase, PknB, regulates competence  
626 development, bacteriocin production, and cell wall metabolism. *Infect Immun* 78:2209-  
627 2220.

- 628 25. Dufour D, Cordova M, Cvitkovitch DG, Levesque CM. 2011. Regulation of the  
629 competence pathway as a novel role associated with a streptococcal bacteriocin. *J*  
630 *Bacteriol* 193:6552-6559.
- 631 26. Kim JN, Stanhope MJ, Burne RA. 2013. Core-gene-encoded peptide regulating  
632 virulence-associated traits in *Streptococcus mutans*. *J Bacteriol* 195:2912-2920.
- 633 27. Levesque CM, Mair RW, Perry JA, Lau PC, Li YH, Cvitkovitch DG. 2007. Systemic  
634 inactivation and phenotypic characterization of two-component systems in expression  
635 of *Streptococcus mutans* virulence properties. *Lett Appl Microbiol* 45:398-404.
- 636 28. Okinaga T, Xie Z, Niu G, Qi F, Merritt J. 2010. Examination of the *hdrRM* regulon  
637 yields insight into the competence system of *Streptococcus mutans*. *Mol Oral Microbiol*  
638 25:165-177.
- 639 29. Qi F, Merritt J, Lux R, Shi W. 2004. Inactivation of the *ciaH* Gene in *Streptococcus*  
640 *mutans* diminishes mutacin production and competence development, alters sucrose-  
641 dependent biofilm formation, and reduces stress tolerance. *Infect Immun* 72:4895-4899.
- 642 30. Underhill SAM, Shields RC, Burne RA, Hagen SJ. 2019. Carbohydrate and PepO  
643 control bimodality in competence development by *Streptococcus mutans*. *Mol*  
644 *Microbiol* 112:1388-1402.
- 645 31. Xie Z, Okinaga T, Niu G, Qi F, Merritt J. 2010. Identification of a novel bacteriocin  
646 regulatory system in *Streptococcus mutans*. *Mol Microbiol* 78:1431-1447.
- 647 32. Chastanet A, Prudhomme M, Claverys JP, Msadek T. 2001. Regulation of  
648 *Streptococcus pneumoniae clp* genes and their role in competence development and  
649 stress survival. *J Bacteriol* 183:7295-7307.
- 650 33. Shields RC, Zeng L, Culp DJ, Burne RA. 2018. Genomewide Identification of Essential  
651 Genes and Fitness Determinants of *Streptococcus mutans* UA159. *mSphere* 3:e00031-  
652 18.
- 653 34. Cui L, Vigouroux A, Rousset F, Varet H, Khanna V, Bikard D. 2018. A CRISPRi screen  
654 in *E. coli* reveals sequence-specific toxicity of dCas9. *Nat Commun* 9:1912.
- 655 35. Liu X, Gallay C, Kjos M, Domenech A, Slager J, van Kessel SP, Knoops K, Sorg RA,  
656 Zhang JR, Veening JW. 2017. High-throughput CRISPRi phenotyping identifies new  
657 essential genes in *Streptococcus pneumoniae*. *Mol Syst Biol* 13:931.
- 658 36. Liu X, Kimmey JM, Matarazzo L, de B, V, Van ML, Sirard JC, Nizet V, Veening JW.  
659 2021. Exploration of bacterial bottlenecks and *Streptococcus pneumoniae* pathogenesis  
660 by CRISPRi-Seq. *Cell Host Microbe* 29:107-120.
- 661 37. Van den Bogert B, Boekhorst J, Herrmann R, Smid EJ, Zoetendal EG, Kleerebezem M.  
662 2013. Comparative genomics analysis of *Streptococcus* isolates from the human small  
663 intestine reveals their adaptation to a highly dynamic ecosystem. *PLoS One* 8:e83418.
- 664 38. Sorg RA, Kuipers OP, Veening JW. 2015. Gene expression platform for synthetic  
665 biology in the human pathogen *Streptococcus pneumoniae*. *ACS Synth Biol* 4:228-239.

- 666 39. Boutry C, Wahl A, Delplace B, Clippe A, Fontaine L, Hols P. 2012. Adaptor protein  
667 MecA is a negative regulator of the expression of late competence genes in  
668 *Streptococcus thermophilus*. *J Bacteriol* 194:1777-1788.
- 669 40. Knoops A, Ledesma-Garcia L, Waegemans A, Lamontagne M, Decat B, Degand H,  
670 Morsomme P, Soumillion P, Delvigne F, Hols P. 2022. Competence shut-off by  
671 intracellular pheromone degradation in salivarius streptococci. *PLoS Genet*  
672 18:e1010198.
- 673 41. Li W, Koster J, Xu H, Chen CH, Xiao T, Liu JS, Brown M, Liu XS. 2015. Quality  
674 control, modeling, and visualization of CRISPR screens with MAGeCK-VISPR.  
675 *Genome Biol* 16:281.
- 676 42. Wahl A, Servais F, Drucbert AS, Foulon C, Fontaine L, Hols P. 2014. Control of natural  
677 transformation in salivarius Streptococci through specific degradation of sigmaX by the  
678 MecA-ClpCP protease complex. *J Bacteriol* 196:2807-2816.
- 679 43. Claverys JP, Havarstein LS. 2007. Cannibalism and fratricide: mechanisms and raisons  
680 d'etre. *Nat Rev Microbiol* 5:219-229.
- 681 44. Tatusov RL, Galperin MY, Natale DA, Koonin EV. 2000. The COG database: a tool  
682 for genome-scale analysis of protein functions and evolution. *Nucleic Acids Res* 28:33-  
683 36.
- 684 45. Neuhaus FC, Baddiley J. 2003. A continuum of anionic charge: structures and functions  
685 of D-alanyl-teichoic acids in gram-positive bacteria. *Microbiol Mol Biol Rev* 67:686-  
686 723.
- 687 46. Levander F, Radstrom P. 2001. Requirement for phosphoglucomutase in  
688 exopolysaccharide biosynthesis in glucose- and lactose-utilizing *Streptococcus*  
689 *thermophilus*. *Appl Environ Microbiol* 67:2734-2738.
- 690 47. Henry C, Haller L, Blein-Nicolas M, Zivy M, Canette A, Verbrugghe M, Mezange C,  
691 Boulay M, Gardan R, Samson S, Martin V, Andre-Leroux G, Monnet V. 2019.  
692 Identification of Hanks-Type Kinase PknB-Specific Targets in the *Streptococcus*  
693 *thermophilus* Phosphoproteome. *Front Microbiol* 10:1329.
- 694 48. Pereira SF, Goss L, Dworkin J. 2011. Eukaryote-like serine/threonine kinases and  
695 phosphatases in bacteria. *Microbiol Mol Biol Rev* 75:192-212.
- 696 49. Devine KM. 2018. Activation of the PhoPR-Mediated Response to Phosphate  
697 Limitation Is Regulated by Wall Teichoic Acid Metabolism in *Bacillus subtilis*. *Front*  
698 *Microbiol* 9:2678.
- 699 50. Eldholm V, Gutt B, Johnsborg O, Bruckner R, Maurer P, Hakenbeck R, Mascher T,  
700 Havarstein LS. 2010. The pneumococcal cell envelope stress-sensing system LiaFSR is  
701 activated by murein hydrolases and lipid II-interacting antibiotics. *J Bacteriol*  
702 192:1761-1773.
- 703 51. Ganguly T, Kajfasz JK, Abranches J, Lemos JA. 2020. Regulatory circuits controlling  
704 Spx levels in *Streptococcus mutans*. *Mol Microbiol* 114:109-126.

- 705 52. Rojas-Tapias DF, Helmann JD. 2018. Stabilization of *Bacillus subtilis* Spx under cell  
706 wall stress requires the anti-adaptor protein YirB. *PLoS Genet* 14:e1007531.
- 707 53. Suntharalingam P, Senadheera MD, Mair RW, Levesque CM, Cvitkovitch DG. 2009.  
708 The LiaFSR system regulates the cell envelope stress response in *Streptococcus mutans*.  
709 *J Bacteriol* 191:2973-2984.
- 710 54. Ulrych A, Fabrik I, Kupcik R, Vajrychova M, Doubravova L, Branny P. 2021. Cell Wall  
711 Stress Stimulates the Activity of the Protein Kinase StkP of *Streptococcus pneumoniae*,  
712 Leading to Multiple Phosphorylation. *J Mol Biol* 433:167319.
- 713 55. Shah IM, Laaberki MH, Popham DL, Dworkin J. 2008. A eukaryotic-like Ser/Thr  
714 kinase signals bacteria to exit dormancy in response to peptidoglycan fragments. *Cell*  
715 135:486-496.
- 716 56. Beilharz K, Novakova L, Fadda D, Branny P, Massidda O, Veening JW. 2012. Control  
717 of cell division in *Streptococcus pneumoniae* by the conserved Ser/Thr protein kinase  
718 StkP. *Proc Natl Acad Sci U S A* 109:E905-E913.
- 719 57. Dias R, Felix D, Canica M, Trombe MC. 2009. The highly conserved serine threonine  
720 kinase StkP of *Streptococcus pneumoniae* contributes to penicillin susceptibility  
721 independently from genes encoding penicillin-binding proteins. *BMC Microbiol* 9:121.
- 722 58. Fleurie A, Cluzel C, Guiral S, Fretton C, Galisson F, Zanella-Cleon I, Di Guilmi AM,  
723 Grangeasse C. 2012. Mutational dissection of the S/T-kinase StkP reveals crucial roles  
724 in cell division of *Streptococcus pneumoniae*. *Mol Microbiol* 83:746-758.
- 725 59. Zhang R, Xu W, Shao S, Wang Q. 2021. Gene Silencing Through CRISPR Interference  
726 in Bacteria: Current Advances and Future Prospects. *Front Microbiol* 12:635227.
- 727 60. Tian XL, Dong G, Liu T, Gomez ZA, Wahl A, Hols P, Li YH. 2013. MecA protein acts  
728 as a negative regulator of genetic competence in *Streptococcus mutans*. *J Bacteriol*  
729 195:5196-5206.
- 730 61. Shields RC, O'Brien G, Maricic N, Kesterson A, Grace M, Hagen SJ, Burne RA. 2018.  
731 Genome-Wide Screens Reveal New Gene Products That Influence Genetic Competence  
732 in *Streptococcus mutans*. *J Bacteriol* 200:e00508-17.
- 733 62. Dmitriev A, Mohapatra SS, Chong P, Neely M, Biswas S, Biswas I. 2011. CovR-  
734 controlled global regulation of gene expression in *Streptococcus mutans*. *PLoS One*  
735 6:e20127.
- 736 63. Stevens KE, Chang D, Zwack EE, Sebert ME. 2011. Competence in *Streptococcus*  
737 *pneumoniae* is regulated by the rate of ribosomal decoding errors. *mBio* 2:e00071-11.
- 738 64. Khemici V, Prudhomme M, Polard P. 2021. Tight Interplay between Replication Stress  
739 and Competence Induction in *Streptococcus pneumoniae*. *Cells* 10:1938.
- 740 65. Slager J, Kjos M, Attaiech L, Veening JW. 2014. Antibiotic-induced replication stress  
741 triggers bacterial competence by increasing gene dosage near the origin. *Cell* 157:395-  
742 406.



- 743 66. Winther KS, Roghanian M, Gerdes K. 2018. Activation of the Stringent Response by  
744 Loading of RelA-tRNA Complexes at the Ribosomal A-Site. *Mol Cell* 70:95-105.
- 745 67. Kaspar J, Kim JN, Ahn SJ, Burne RA. 2016. An Essential Role for (p)ppGpp in the  
746 Integration of Stress Tolerance, Peptide Signaling, and Competence Development in  
747 *Streptococcus mutans*. *Front Microbiol* 7:1162.
- 748 68. Horstmann N, Saldana M, Sahasrabhojane P, Yao H, Su X, Thompson E, Koller A,  
749 Shelburne SA, III. 2014. Dual-site phosphorylation of the control of virulence regulator  
750 impacts group a streptococcal global gene expression and pathogenesis. *PLoS Pathog*  
751 10:e1004088.
- 752 69. Lin WJ, Walthers D, Connelly JE, Burnside K, Jewell KA, Kenney LJ, Rajagopal L.  
753 2009. Threonine phosphorylation prevents promoter DNA binding of the Group B  
754 *Streptococcus* response regulator CovR. *Mol Microbiol* 71:1477-1495.
- 755 70. Dufour D, Villemin C, Perry JA, Levesque CM. 2016. Escape from the competence  
756 state in *Streptococcus mutans* is governed by the bacterial population density. *Mol Oral*  
757 *Microbiol* 31:501-514.
- 758 71. Mignolet J, Fontaine L, Kleerebezem M, Hols P. 2016. Complete Genome Sequence of  
759 *Streptococcus salivarius* HSISS4, a Human Commensal Bacterium Highly Prevalent in  
760 the Digestive Tract. *Genome Announc* 4:e01637-15.
- 761 72. Letort C, Juillard V. 2001. Development of a minimal chemically-defined medium for  
762 the exponential growth of *Streptococcus thermophilus*. *J Appl Microbiol* 91:1023-1029.
- 763 73. Fontaine L, Dandoy D, Boutry C, Delplace B, de Frahan MH, Fremaux C, Horvath P,  
764 Boyaval P, Hols P. 2010. Development of a versatile procedure based on natural  
765 transformation for marker-free targeted genetic modification in *Streptococcus*  
766 *thermophilus*. *Appl Environ Microbiol* 76:7870-7877.
- 767 74. Dorrazehi GM, Worms S, Chirakadavil JB, Mignolet J, Hols P, Soumillion S. 2020.  
768 Building Scarless Gene Libraries in the Chromosome of Bacteria, p 189-211. *In*: Iranzo  
769 O, Roque A (ed), Peptide and Protein Engineering, Springer Protocols Handbooks.  
770 Humana, New York, NY.
- 771 75. Lu S, Wang J, Chitsaz F, Derbyshire MK, Geer RC, Gonzales NR, Gwadz M, Hurwitz  
772 DI, Marchler GH, Song JS, Thanki N, Yamashita RA, Yang M, Zhang D, Zheng C,  
773 Lanczycki CJ, Marchler-Bauer A. 2020. CDD/SPARCLE: the conserved domain  
774 database in 2020. *Nucleic Acids Res* 48:D265-D268.
- 775 76. Ogura M, Hashimoto H, Tanaka T. 2002. Med, a cell-surface localized protein  
776 regulating a competence transcription factor gene, *comK*, in *Bacillus subtilis*. *Biosci*  
777 *Biotechnol Biochem* 66:892-896.  
778  
779  
780

781 **TABLES AND FIGURES**

782 **Table 1. gRNA identification in spontaneous transformants**

| gRNA ID           | Genome position | Interference target | Gene name    | Locus tag    | Comment/function                                                 | Transformation rate |
|-------------------|-----------------|---------------------|--------------|--------------|------------------------------------------------------------------|---------------------|
| g_37              | 83910           | Gene                | <i>clpC</i>  | HSISS4_00061 | ComX degradation machinery ClpC                                  | 2.00E-06            |
| g_38              | 85320           | Gene                | <i>clpC</i>  | HSISS4_00061 | ComX degradation machinery ClpC                                  | 6.00E-06            |
| g_39              | 412742          | Gene                | <i>pepF</i>  | HSISS4_00369 | Oligoendopeptidase F                                             | 4.00E-06            |
| g_27              | 1589000         | Gene                |              | HSISS4_01391 | Bactoprenol glucosyltransferase                                  | 3.40E-02            |
| g_30              | 1823312         | Gene                |              | HSISS4_01622 | Hypothetical protein                                             | 2.00E-06            |
| g_32              | 875880          | Gene                |              | HSISS4_00805 | Hypothetical protein                                             | 5.80E-04            |
| g_35              | 1442100         | Gene                |              | HSISS4_01302 | Hypothetical protein                                             | 4.00E-06            |
| g_33              | multiple sites  | Ribosomal RNA       |              |              | 16S ribosomal RNA                                                | 4.00E-06            |
| g_34              | multiple sites  | Ribosomal RNA       |              |              | 16S ribosomal RNA                                                | 2.00E-06            |
| g_36              | multiple sites  | Ribosomal RNA       |              |              | 16S ribosomal RNA                                                | 2.00E-06            |
| g_26              | 112760          | Gene                | <i>gpmB</i>  | HSISS4_00092 | Phosphoglycerate mutase                                          | ND <sup>a</sup>     |
| g_42              | 499523          | Gene                | <i>carB</i>  | HSISS4_00444 | Carbamoyl synthase                                               | ND                  |
| g_40 <sup>b</sup> | 1270227         | Gene                | <i>scuR</i>  | HSISS4_01166 | Intracellular receptor, bacteriocin-related communication system | ND                  |
| g_40 <sup>b</sup> | 1272924         | Gene                | <i>sarF</i>  | HSISS4_01169 | Intracellular receptor, bacteriocin-related communication system | ND                  |
| g_41              | 1775841         | Gene                | <i>pepXP</i> | HSISS4_01580 | Dipeptidyl peptidase                                             | ND                  |
| g_31              | 714120          | Gene                |              | HSISS4_00663 | Extracellular nuclease 2                                         | ND                  |
| g_43              | 664598          | Intergenic          |              |              |                                                                  | ND                  |

783 <sup>a</sup> ND, not detected.

784 <sup>b</sup> g\_40 gRNA recognizes both *scuR* and *sarF* genes.

785



786 **Table 2. Identification of competence costly genes from the gRNA depletion screen**

| Gene name                    | Locus tag    | Comment/function                                                 | Fitness cost score without competence induction <sup>a</sup> | Std residual (< -2.5) <sup>b</sup> |
|------------------------------|--------------|------------------------------------------------------------------|--------------------------------------------------------------|------------------------------------|
| <b>Competence-related</b>    |              |                                                                  |                                                              |                                    |
| <i>comR</i>                  | HSISS4_00217 | Competence intracellular receptor                                | 0.00                                                         | -5.58                              |
| <i>amiF1</i>                 | HSISS4_01361 | Oligopeptide ABC transporter, ATP-binding subunit F              | -0.52                                                        | -2.94                              |
| <i>amiE</i>                  | HSISS4_01362 | Oligopeptide ABC transporter, ATP-binding subunit E              | -0.47                                                        | -3.68                              |
| <i>amiD</i>                  | HSISS4_01363 | Oligopeptide ABC transporter, permease subunit D                 | -0.52                                                        | -3.53                              |
| <i>amiC</i>                  | HSISS4_01364 | Oligopeptide ABC transporter, permease subunit C                 | -0.51                                                        | -3.59                              |
| <i>amiA3A</i>                | HSISS4_01365 | Oligopeptide ABC transporter, oligopeptide binding subunit A     | -0.44                                                        | -3.37                              |
|                              | HSISS4_01664 | SlvX immunity protein                                            | 0.08                                                         | -4.94                              |
| <i>slvX</i>                  | HSISS4_01665 | Bacteriocin                                                      | -0.04                                                        | -4.73                              |
| <i>mecA</i>                  | HSISS4_00128 | ComX degradation machinery adaptor protein                       | -0.22                                                        | -6.19                              |
| <i>spxA1</i>                 | HSISS4_00943 | Transcriptional regulator                                        | 0.38                                                         | -2.80                              |
| <b>Cell-envelope-related</b> |              |                                                                  |                                                              |                                    |
| <i>stkP</i>                  | HSISS4_01348 | Serine-Threonine kinase                                          | 0.44                                                         | -2.98                              |
| <i>acpP1</i>                 | HSISS4_00021 | Acyl carrier protein                                             | 0.06                                                         | -2.54                              |
| <i>rgpG</i>                  | HSISS4_00129 | Polysaccharide synthesis protein                                 | -0.21                                                        | -5.92                              |
| <i>rgpF</i>                  | HSISS4_01378 | Polysaccharide synthesis protein                                 | -0.21                                                        | -4.43                              |
| <i>rgpE</i>                  | HSISS4_01379 | Extracellular rhamnan synthesis protein                          | -0.94                                                        | -5.20                              |
| <i>rgpA2</i>                 | HSISS4_01383 | Extracellular rhamnan synthesis protein                          | -2.37                                                        | -3.52                              |
| <i>rmlA1</i>                 | HSISS4_00723 | Rhamnose synthesis protein                                       | -0.55                                                        | -6.66                              |
| <i>rmlC</i>                  | HSISS4_00724 | Rhamnose synthesis protein                                       | -0.69                                                        | -4.77                              |
| <i>rmlB</i>                  | HSISS4_00725 | Rhamnose synthesis protein                                       | -0.85                                                        | -4.62                              |
| <i>pgmA</i>                  | HSISS4_01102 | Phosphoglucomutase                                               | -0.12                                                        | -3.61                              |
| <i>dgk</i>                   | HSISS4_00536 | Lipid carrier recycler                                           | -2.28                                                        | -2.71                              |
| <i>murG</i>                  | HSISS4_00684 | Peptidoglycan Lipid II precursor synthesis                       | -3.98                                                        | -2.62                              |
|                              | HSISS4_00889 | Exporter of O-antigen, teichoic acids, lipoteichoic acids (WpsG) | -0.24                                                        | -3.97                              |
| <i>dltD</i>                  | HSISS4_01108 | Poly(glycerolphosphate chain) D-alanine transfer protein         | -0.03                                                        | -2.98                              |
| <i>dltC</i>                  | HSISS4_01109 | D-Alanine phosphoribitol ligase subunit 2                        | -0.48                                                        | -3.68                              |
| <i>dltB</i>                  | HSISS4_01110 | D-alanyl transfer protein                                        | -0.31                                                        | -3.87                              |
| <i>dltA</i>                  | HSISS4_01111 | D-Alanine phosphoribitol ligase subunit 1                        | -0.39                                                        | -3.52                              |
| <i>dltX</i>                  | HSISS4_01112 | D-Ala-teichoic acid biosynthesis protein                         | -0.63                                                        | -2.93                              |
| <i>pstB1</i>                 | HSISS4_00936 | Phosphate transport, ATP binding protein                         | 0.37                                                         | -3.00                              |
| <i>pstC2</i>                 | HSISS4_00937 | Phosphate transport, permease protein                            | 0.38                                                         | -3.39                              |
| <i>pstC1</i>                 | HSISS4_00938 | Phosphate transport, permease protein                            | 0.38                                                         | -3.27                              |
| <i>pstS</i>                  | HSISS4_00939 | Phosphate transport, phosphate binding protein                   | 0.40                                                         | -3.14                              |
| <i>divIC</i>                 | HSISS4_00008 | Cell division protein                                            | -3.85                                                        | -5.27                              |

|                    |               |                                  |       |       |
|--------------------|---------------|----------------------------------|-------|-------|
| <i>ftsL</i>        | HSISS4_01598  | Cell division protein            | -4.12 | -3.29 |
| <b>Translation</b> |               |                                  |       |       |
| <i>prfB</i>        | HSISS4_00848  | Peptide chain release factor     | -0.06 | -4.39 |
| <i>proS</i>        | HSISS4_00152  | Prolyl tRNA synthetase           | -3.77 | -2.53 |
| <i>rplM</i>        | HSISS4_00076  | Large subunit ribosomal protein  | -3.67 | -3.53 |
| <i>rplX</i>        | HSISS4_01812  | Large subunit ribosomal protein  | -3.51 | -4.15 |
| <i>rpsU</i>        | HSISS4_01396  | Small subunit ribosomal protein  | -1.23 | -5.40 |
| <i>rpsF</i>        | HSISS4_01661  | Small subunit ribosomal protein  | -3.81 | -3.04 |
| <i>rpsE</i>        | HSISS4_01806  | Small subunit ribosomal protein  | -3.88 | -2.64 |
| <i>rpsS</i>        | HSISS4_01819  | Small subunit ribosomal protein  | -3.84 | -2.90 |
|                    | HSISS4_00271  | Ribosomal protein                | -3.75 | -2.80 |
|                    | HSISS4_r00031 | tRNA Met                         | -4.37 | -7.16 |
|                    | HSISS4_r00059 | tRNA Glu                         | -4.03 | -3.17 |
|                    | HSISS4_r00070 | tRNA Arg                         | -3.67 | -2.56 |
| <b>Others</b>      |               |                                  |       |       |
| <i>ctsR</i>        | HSISS4_00060  | Stress transcriptional regulator | -0.09 | -2.57 |
| <i>atpE</i>        | HSISS4_00399  | ATP synthase                     | -3.15 | -2.65 |
| <i>pyrH</i>        | HSISS4_00354  | Uridine monophosphate kinase     | -0.94 | -3.03 |
| <i>sipA</i>        | HSISS4_01673  | Secretory signal peptidase       | -0.87 | -2.63 |
|                    | HSISS4_00898  | Permease                         | 0.05  | -2.73 |
|                    | HSISS4_00523  | Hypothetical protein             | 0.16  | -3.82 |
|                    | HSISS4_00888  | Hypothetical protein             | -0.03 | -3.30 |

787 <sup>a</sup> Fitness-cost scores were computed with the MAGeCK algorithm (41) by comparing the total  
 788 depletion of gRNAs per gene in the mock condition with the library-induced condition (Ci).

789 <sup>b</sup> Standardized (Std) residuals (cut-off value < -2.5) were calculated as the deviation from the  
 790 linear regression performed with the fitness-cost scores for conditions with library induction  
 791 (Ci) and with library induction together with competence induction (Ci+C).  
 792

793 **Table 3. Identification of competence-associated antagonist genes from  $\beta$ -Gal screen**

| Gene name                              | Locus tag    | Comment/function                                                                                     | Normalized count (> 0.01) <sup>a</sup> | Mean log <sub>2</sub> (FC) Lux (> 0.5) <sup>b</sup> |
|----------------------------------------|--------------|------------------------------------------------------------------------------------------------------|----------------------------------------|-----------------------------------------------------|
| <b>Competence-related <sup>c</sup></b> |              |                                                                                                      |                                        |                                                     |
| <i>hk13</i>                            | HSISS4_01230 | Histidine kinase                                                                                     | 0.03                                   | 1.80                                                |
| <i>manL1</i>                           | HSISS4_00257 | PTS system, mannose-specific IIAB component                                                          | 0.34                                   | 0.66                                                |
| <i>manM1</i>                           | HSISS4_00256 | PTS system, mannose-specific IIC component                                                           | 0.17                                   | 0.66                                                |
| <i>manN1</i>                           | HSISS4_00255 | PTS system, mannose-specific IID component                                                           | 0.19                                   | 0.70                                                |
| <i>med</i>                             | HSISS4_01089 | Nucleoside-binding protein                                                                           | 0.06                                   | 0.57                                                |
| <b>Cell-envelope-related</b>           |              |                                                                                                      |                                        |                                                     |
| <i>stkP</i>                            | HSISS4_01348 | Serine-threonine protein kinase                                                                      | 0.10                                   | 1.02                                                |
| <i>LiaF</i>                            | HSISS4_01346 | LiaSR-associated transporter                                                                         | 0.04                                   | 1.08                                                |
| <i>pIsX</i>                            | HSISS4_00020 | Phosphate:acyl-ACP acyltransferase                                                                   | 0.11                                   | 1.52                                                |
|                                        | HSISS4_01826 | Acyltransferase family                                                                               | 0.04                                   | 0.72                                                |
| <i>murJ</i>                            | HSISS4_00717 | Lipid II flippase                                                                                    | 0.06                                   | 1.28                                                |
| <i>murC</i>                            | HSISS4_00190 | UDP-N-acetylmuramate-alanine ligase                                                                  | 0.04                                   | 0.81                                                |
| <i>murZ</i>                            | HSISS4_01465 | UDP-N-acetylglucosamine 1-carboxyvyniltransferase                                                    | 0.03                                   | 1.41                                                |
| <i>glmS</i>                            | HSISS4_01060 | Glucosamine--fructose-6-phosphate aminotransferase isomerizing                                       | 0.02                                   | 0.80                                                |
| <i>gcaD</i>                            | HSISS4_00481 | N-acetylglucosamine-1-phosphate uridyltransferase/Glucosamine-1-phosphate N-acetyltransferase (GlmU) | 0.02                                   | 0.86                                                |
| <i>rgpX3</i>                           | HSISS4_01386 | Heteropolysaccharide repeat unit export protein                                                      | 0.04                                   | 1.44                                                |
|                                        | HSISS4_00330 | Lipopolysaccharide biosynthesis protein                                                              | 0.04                                   | 0.85                                                |
| <i>dltA</i>                            | HSISS4_01111 | D-alanine--poly(phosphoribitol) ligase subunit 1                                                     | 0.04                                   | 0.67                                                |
| <i>dltB</i>                            | HSISS4_01110 | D-alanyl transfer protein                                                                            | 0.02                                   | 1.17                                                |
| <i>pstC1</i>                           | HSISS4_00938 | Phosphate transport system permease protein                                                          | 0.03                                   | 1.29                                                |
| <i>pgmA</i>                            | HSISS4_01102 | Phosphoglucomutase                                                                                   | 0.05                                   | 0.98                                                |
| <i>asp3</i>                            | HSISS4_01316 | Accessory secretory protein                                                                          | 0.04                                   | 0.71                                                |
| <i>pcsB2</i>                           | HSISS4_00358 | GBS surface immunogenic protein                                                                      | 0.02                                   | 1.48                                                |
| <b>Amino-acid metabolism</b>           |              |                                                                                                      |                                        |                                                     |
| <i>sdaA</i>                            | HSISS4_01162 | L-serine dehydratase, alpha subunit                                                                  | 0.05                                   | 1.26                                                |
| <i>argJ</i>                            | HSISS4_00385 | Glutamate N-acetyltransferase/N-acetylglutamate synthase                                             | 0.02                                   | 0.98                                                |
| <i>pepP</i>                            | HSISS4_01648 | Aminopeptidase P                                                                                     | 0.06                                   | 1.10                                                |
| <i>pepS</i>                            | HSISS4_00051 | Aminopeptidase S                                                                                     | 0.02                                   | 0.73                                                |
| <i>gnlP</i>                            | HSISS4_01405 | Glutamine ABC transporter/ glutamine-binding permease                                                | 0.04                                   | 0.77                                                |
| <i>livG2</i>                           | HSISS4_00477 | ABC-type multidrug transport transport system, ATPase component                                      | 0.06                                   | 0.60                                                |
| <i>livJ</i>                            | HSISS4_00287 | High-affinity leucine-specific transport system                                                      | 0.03                                   | 1.38                                                |
|                                        | HSISS4_00832 | Glutamate transport membrane-spanning protein                                                        | 0.03                                   | 1.26                                                |
|                                        | HSISS4_00833 | Glutamate transport permease protein                                                                 | 0.05                                   | 1.10                                                |
| <b>Others</b>                          |              |                                                                                                      |                                        |                                                     |
| <i>galR</i>                            | HSISS4_01243 | Galactose operon repressor                                                                           | 0.03                                   | 0.68                                                |
|                                        | HSISS4_01867 | Transcriptional regulator, PadR family                                                               | 0.08                                   | 1.02                                                |
| <i>nusA</i>                            | HSISS4_00269 | Transcription termination protein                                                                    | 0.03                                   | 1.66                                                |

|               |              |                                                             |      |      |
|---------------|--------------|-------------------------------------------------------------|------|------|
| <i>csbA</i>   | HSISS4_01831 | Chromosome segregation helicase                             | 0.03 | 0.56 |
|               | HSISS4_00847 | Epoxyqueuosine (oQ) reductase                               | 0.02 | 0.69 |
| <i>gidA</i>   | HSISS4_01879 | tRNA uridine 5-carboxymethylaminomethyl modification enzyme | 0.02 | 0.79 |
|               | HSISS4_01426 | Acetyltransferase                                           | 0.07 | 0.97 |
|               | HSISS4_01531 | RNA binding protein                                         | 0.08 | 0.79 |
| <i>trxAlA</i> | HSISS4_00080 | Thioredoxin                                                 | 0.13 | 0.76 |
| <i>dnaK1</i>  | HSISS4_00097 | Chaperone protein                                           | 0.02 | 1.77 |
| <i>scrK</i>   | HSISS4_01640 | Fructokinase                                                | 0.10 | 0.87 |
| <i>tpiA</i>   | HSISS4_00409 | Triosephosphate isomerase                                   | 0.08 | 0.85 |
| <i>purF</i>   | HSISS4_00024 | Amidophosphoribosyltransferase                              | 0.02 | 0.76 |
| <i>pyrDb</i>  | HSISS4_00974 | Dihydroorotate dehydrogenase, catalytic subunit             | 0.02 | 1.13 |
|               | HSISS4_01010 | Phenazine biosynthesis-like protein                         | 0.13 | 0.75 |
|               | HSISS4_00044 | hypothetical protein                                        | 0.25 | 0.95 |
|               | HSISS4_00614 | hypothetical protein                                        | 0.03 | 0.92 |
|               | HSISS4_01307 | hypothetical protein                                        | 0.03 | 0.95 |

794 <sup>a</sup> Normalized counts (cut-off value > 0.01) were calculated by dividing the number of gRNAs  
795 targeting one gene by the expected number of gRNAs targeting this gene in the library.

796 <sup>b</sup> Mean of the log<sub>2</sub> fold-change is an average of all the fold-changes in specific Lux activity for  
797 the different gRNAs targeting the same gene (cut-off value > 0.5).

798 <sup>c</sup> *hk13*, *manLMN*, *med* genes were previously reported as involved in competence regulation in  
799 *S. salivarius*, *S. mutans*, and *B. subtilis* respectively (7, 30, 76).

800

801

802

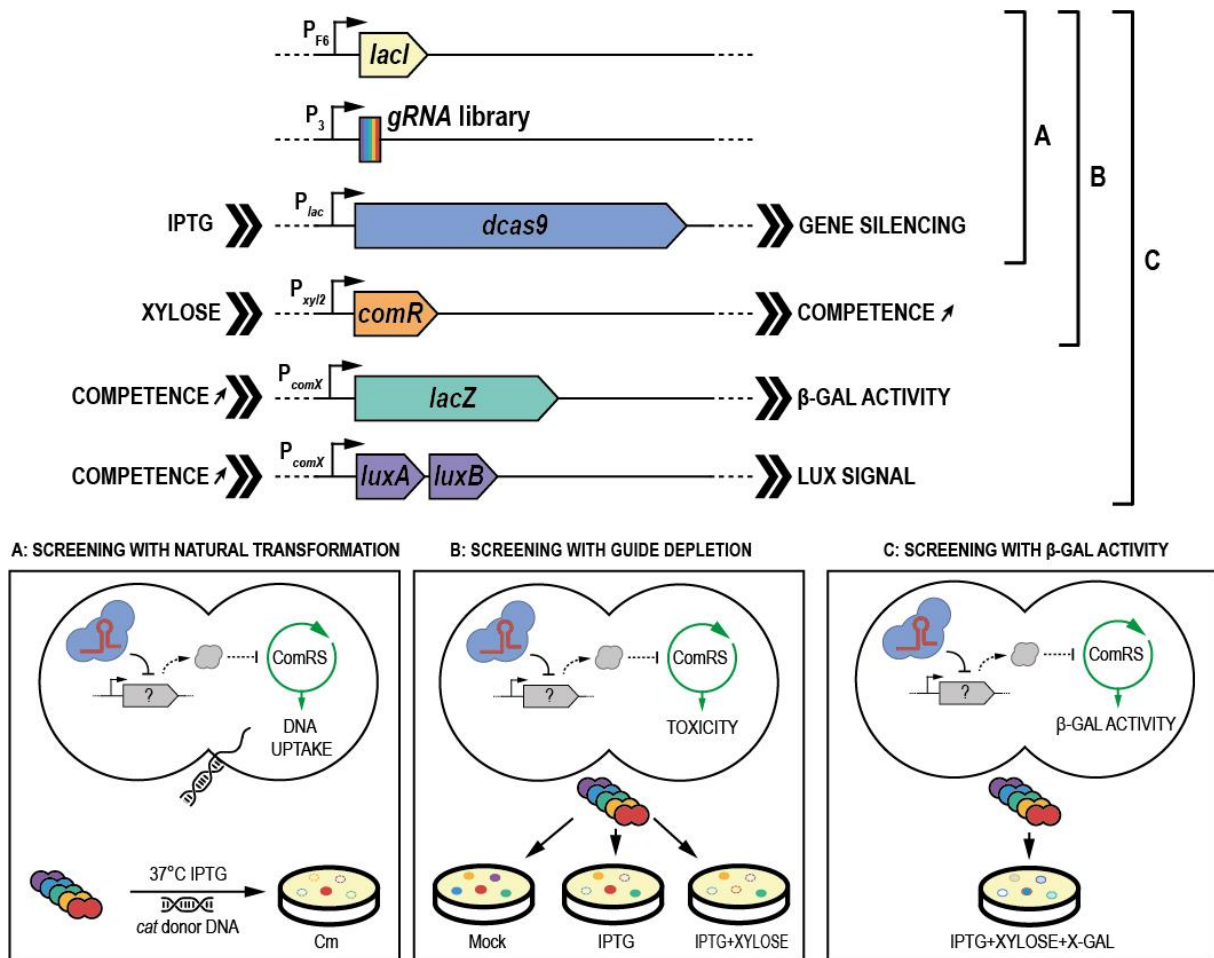

803

804 **Figure 1. CRISPRi screening strategies for competence modulators in *S. salivarius*.** A  
 805 library of gRNAs was designed and introduced ( $P_3$ -gRNA) in an engineered strain of *S.*  
 806 *salivarius* harboring an IPTG-inducible system for dCas9 ( $P_{F6}$ -*lacI*;  $P_{lac}$ -*dcas9*). A first library  
 807 was screened for spontaneous competence activation upon dCas9-inhibition by growing cells  
 808 in chemically defined medium in presence of IPTG and *cat* donor DNA. The selection on  
 809 chloramphenicol plates was associated with inhibition of competence negative players (A). A  
 810 second library was generated by introducing the gRNA library into the same background with  
 811 a supplemental construct consisting of a xylose-inducible promoter fused to *comR* ( $P_{xyl2}$ -*comR*).  
 812 The library was spread on control (mock), gRNA library-induced (IPTG) or gRNA library- and  
 813 competence-induced (IPTG + xylose) plates. NGS analysis of depleted gRNAs in the three  
 814 conditions was performed to search for costly genes only associated to competence (B). A third  
 815 library was built by adding *lacZ* under the control of  $P_{comX}$  ( $P_{comX}$ -*lacZ*) together with a  
 816 competence luciferase reporter system ( $P_{comX}$ -*luxAB*) to the previous strain and transferring the  
 817 gRNA library into this background. The generated library was screened on plates containing  
 818 IPTG, xylose and X-gal. gRNAs targeting potential competence inhibitory or activatory genes  
 819 were associated to dark blue or white phenotypes, respectively (C).

820



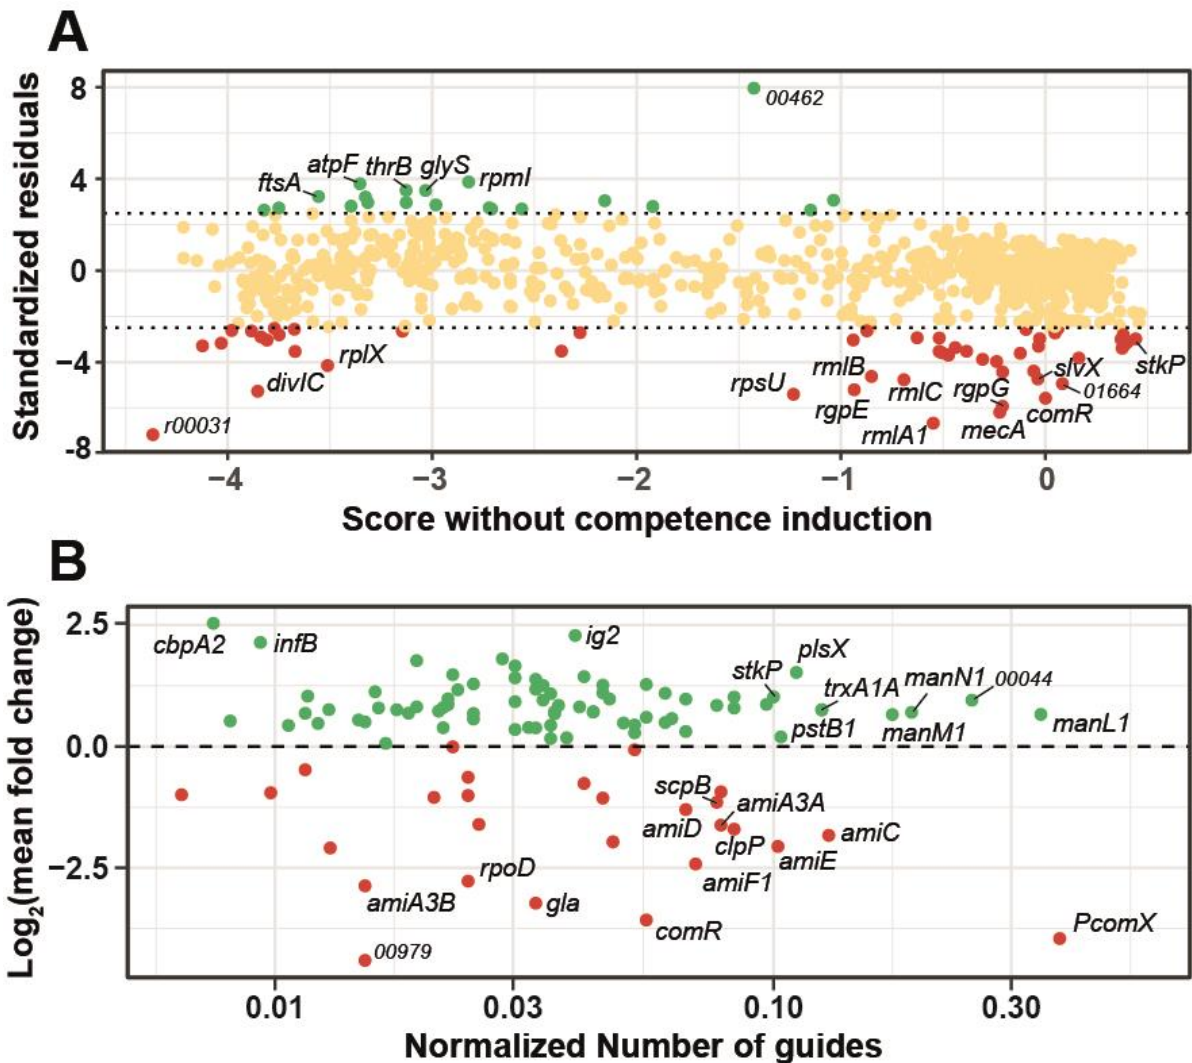

821

822 **Figure 2. Selection of genes from CRISPRi screens.** **A.** gRNA depletion screen. The gRNA  
823 library was grown on M17G plates for ~ 12 generations with no induction (mock), with gRNA  
824 library induction (Ci), or with gRNA library and competence induction (Ci+C). The gRNAs (4  
825 technical replicates per condition, ~40 M reads) were sequenced and mapped thanks to the  
826 MAGeCK-VISPR algorithm (41). Using the same tool, we identify gRNA depletion in costly  
827 genes linked to library induction only (Ci vs mock) and both library and competence induction  
828 (Ci vs Ci+C) (Fig. S2). We then compared the gRNA depletion scores for each gene in both  
829 induction systems and performed a linear regression (Fig. S3). Standardized residuals of the  
830 regression were then computed and plotted in function of the score of each gene in the condition  
831 without competence induction (Ci). Positive (green) and negative (red) standardized residuals  
832 (arbitrary cut-off of +2.5 and -2.5) denote genes with enriched or depleted gRNAs, respectively.  
833 Dots in yellow are considered as non-significantly affected genes. **B.**  $\beta$ -Gal screen. After library  
834 production (~10<sup>5</sup> colonies), screening for dark blue and white clones on M17GL plates (with  
835 IPTG, xylose, and X-gal; *P<sub>comX</sub>-lacZ*, *P<sub>xyI2</sub>-comR*) and validation with luciferase assays (*P<sub>comX</sub>-*  
836 *luxAB*), clones with the most dissimilar luciferase phenotypes (141 dark blue and 68 white  
837 clones) were sequenced for gRNA identification. The y-axis displays the mean fold change  
838 Log<sub>2</sub> value of luciferase activity calculated on all the gRNAs targeting the same gene. The x-  
839 axis displays the number of gRNAs targeting the same gene normalized by the expected total

840 number of gRNAs present in the library for this gene. Green dots and red dots denote gene  
841 inhibition resulting in competence overactivation or repression, respectively.

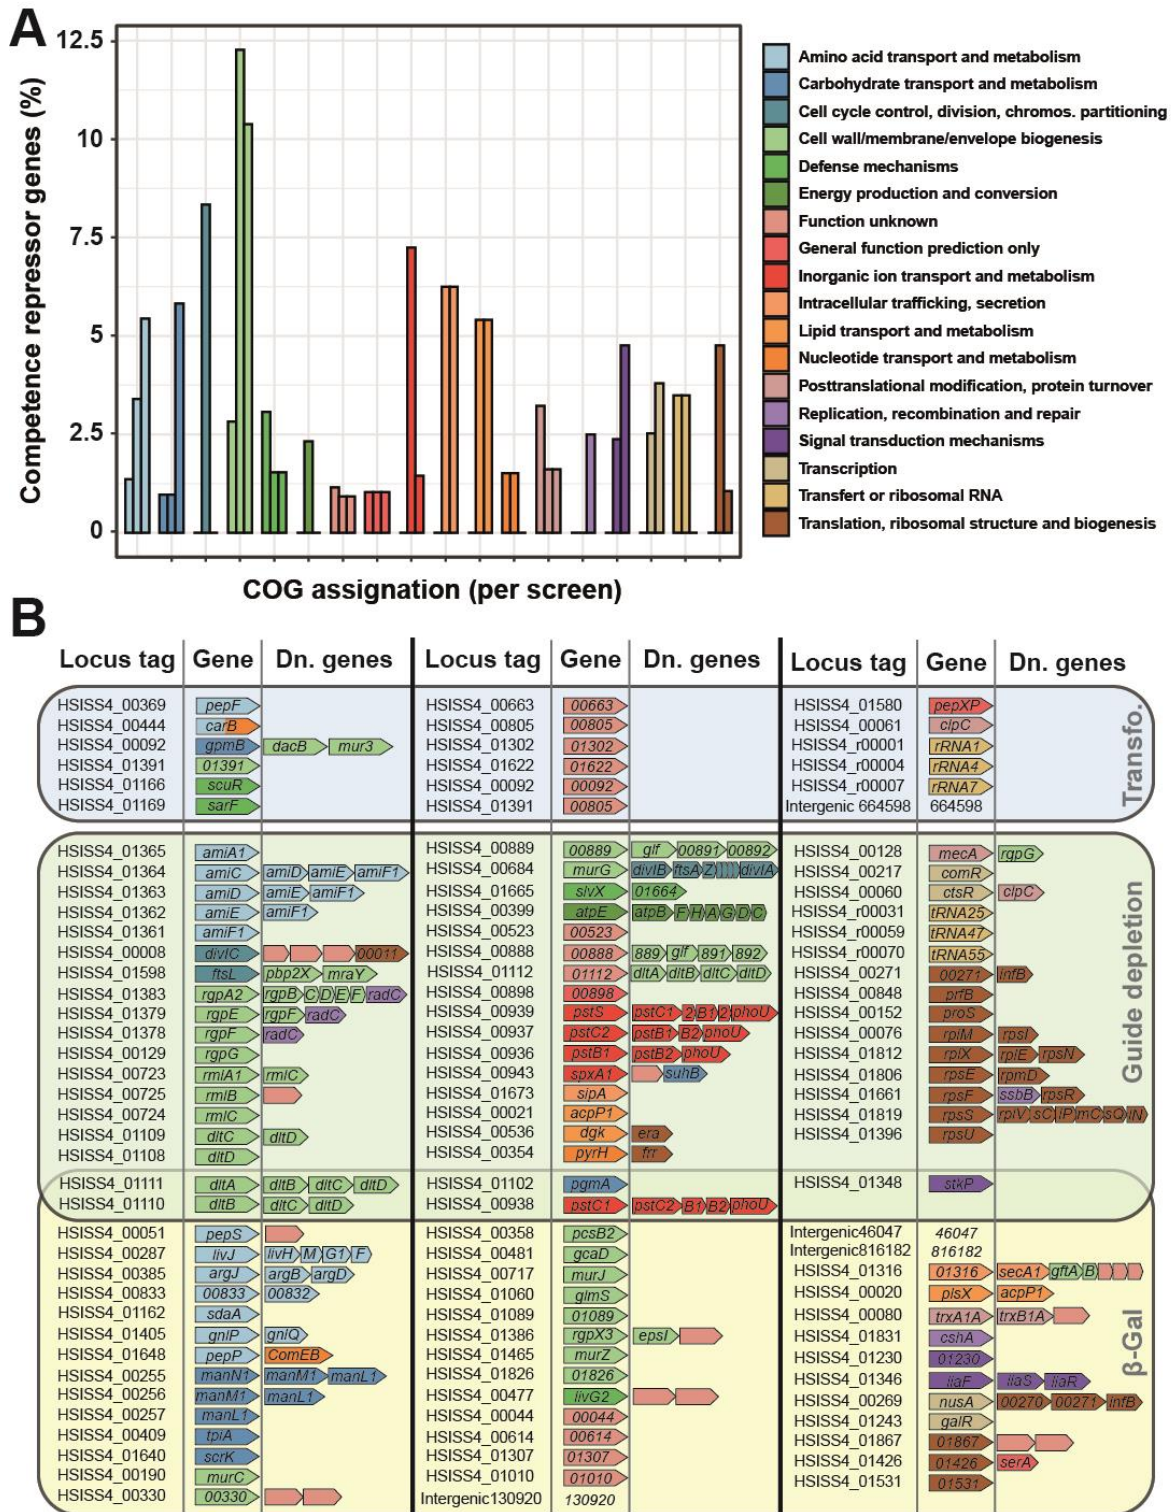

842

843 **Figure 3. Functional assignment of competence repressor genes from CRISPRi screens.**  
 844 **A.** Relative abundance of COG-assigned genes. A COG assignment was associated to every  
 845 gene from the HSISS4 genome. For each COG type, the proportion (%) of selected genes with  
 846 a defined screen was calculated against all the genes with this COG assignment of the genome.  
 847 This proportion is displayed per screen (1<sup>st</sup> bar, transformation screen; 2<sup>nd</sup> bar, gRNA depletion  
 848 screen; 3<sup>rd</sup> bar,  $\beta$ -Gal screen). **B.** Details of all selected genes displayed per screen. Operons  
 849 (Dn. genes) are shown since CRISPRi also silences downstream genes. Genes are colored  
 850 according to their COG assignment.



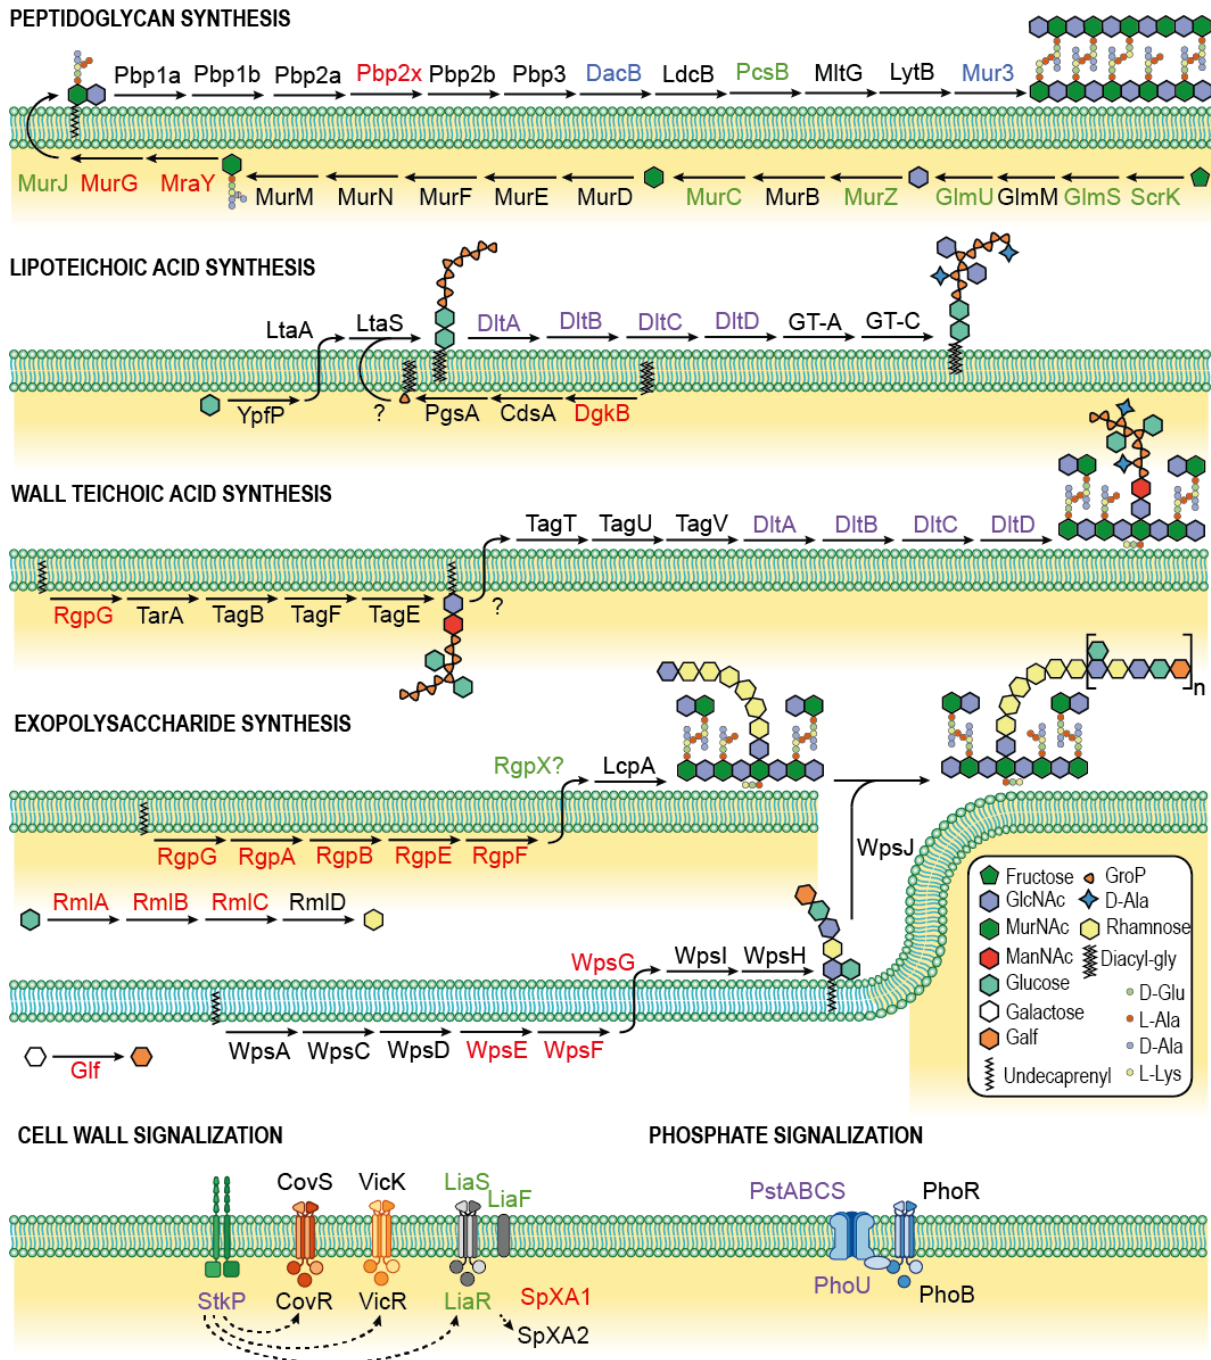

851

852 **Figure 4. Cell-wall pathways and competence negative modulators from CRISPRi**  
 853 **screens.** Major cell-wall biosynthesis and signalization pathways are depicted. Proteins  
 854 selected by the transformation, gRNA depletion, and  $\beta$ -gal screens are shown in blue, red, and  
 855 green, respectively. Proteins selected in both gRNA depletion and  $\beta$ -gal screens are shown in  
 856 light violet. In the absence of literature for complete reconstructed pathways, lipoteichoic acid  
 857 synthesis is based on knowledge from *Staphylococcus aureus*, wall teichoic acid from *B.*  
 858 *subtilis* 168 and polysaccharide synthesis from *L. lactis*. HSISS4\_00889, 00890, 00891 and  
 859 00892 were renamed with *Lactococcus lactis* homologs WpsG, Glf, WpsE and WpsF,  
 860 respectively. GlcNAc, *N*-acetylglucosamine; MurNAc, *N*-acetyl muramic acid; ManNAc, *N*-  
 861 acetylmannosamine; Galf, Galactofuranose; Diacyl-gly, Diacyl-glycerol; GroP, Glycerol-  
 862 phosphate.

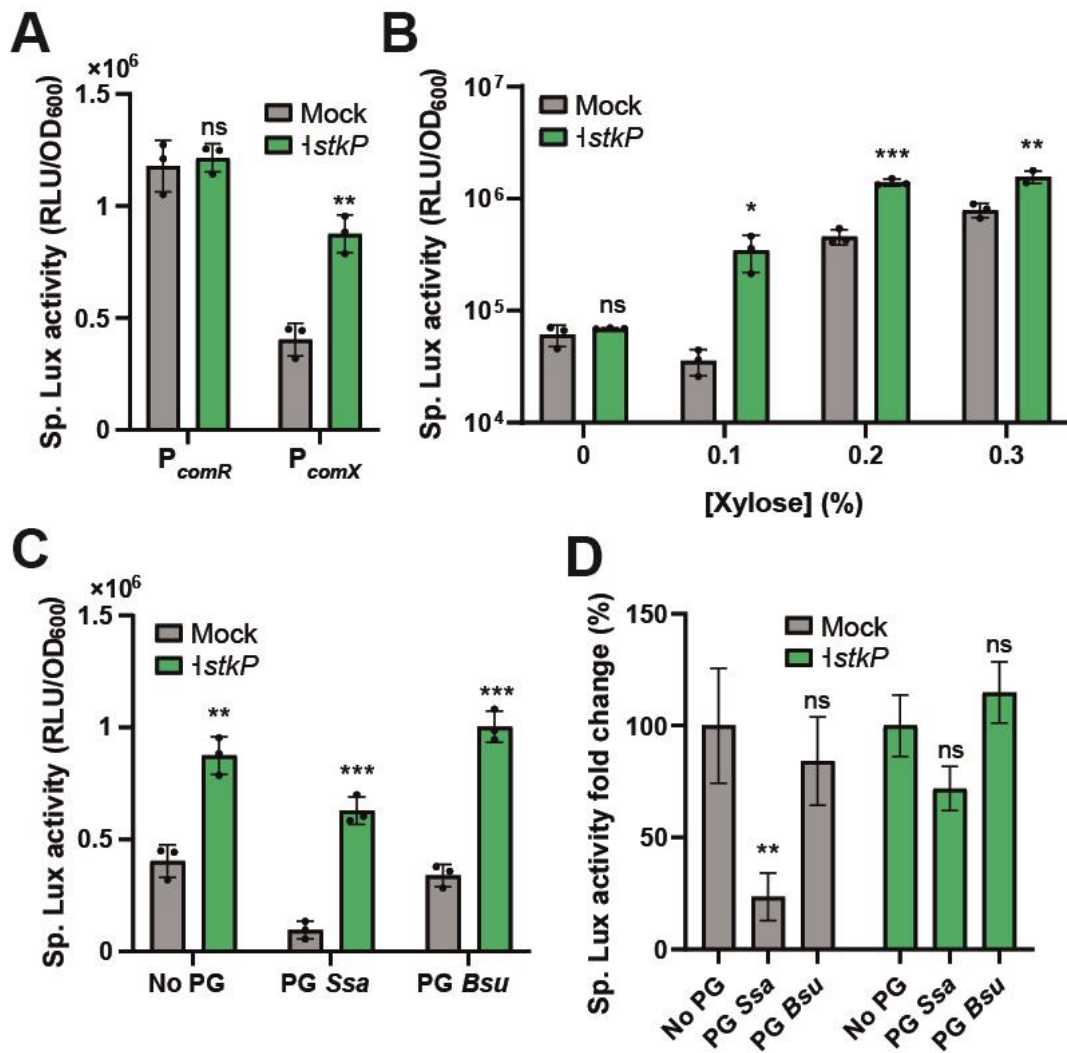

863

864 **Figure 5. StkP controls *comX* expression by sensing peptidoglycan extracts.** A. Effect of  
865 *stkP* inhibition on *comR* and *comX* expression. A dCas9 module (P<sub>F6</sub>-*lacI*; P<sub>lac</sub>-*dcas9*) together  
866 with a gRNA targeting *stkP* (P<sub>3</sub>-g<sub>23</sub>) were used to inhibit *stkP* transcription. The dCas9  
867 interference system was associated to a P<sub>comR</sub>-*luxAB* or a P<sub>comX</sub>-*luxAB* reporter fusion together  
868 with a xylose-inducible *comR* module (P<sub>xyly2</sub>-*comR*). Mock denotes the same strain without  
869 dCas9 interference. B. Effect of ComR level on StkP-mediated activation of *comX*. The P<sub>comX</sub>-  
870 *luxAB* P<sub>xyly2</sub>-*comR* strain (described in A) was incubated with various xylose concentrations (0,  
871 0.1, 0.2, 0.3%) with or without *stkP* inhibition. C. Effect of peptidoglycan (PG) extracts on  
872 StkP-mediated activation of *comX*. PG extracts of *S. salivarius* (PG Ssa) or *B. subtilis* (PG Bsu)  
873 were added to a culture of the P<sub>comX</sub>-*luxAB* strain (described in A) at a final concentration of 0.3  
874 mg/ml. D. Specific Lux activity (%) calculated between the culture with no addition of PG  
875 extracts (No PG, 100%) and the related condition. Percentages were calculated with the data  
876 presented in C. For P<sub>comX</sub>-*luxAB* activation, xylose 0.25% was used except if else stated. For  
877 CRISPRi *stkP* inhibition, IPTG 1 mM was used. Dots denote technical triplicate values for  
878 mock and biological triplicate values for mutants, ± standard deviation. Statistical *t*-test was  
879 performed for each condition in comparison to related control (Ctrl: mock; panels A, B, and D)  
880 or one-way ANOVA with Dunett's test for multiple comparison (Ctrl: No PG; panel E). ns,  
881 non-significative; *P* > 0.05; \*, *P* < 0.05; \*\*, *P* < 0.01; \*\*\*, *P* < 0.001.

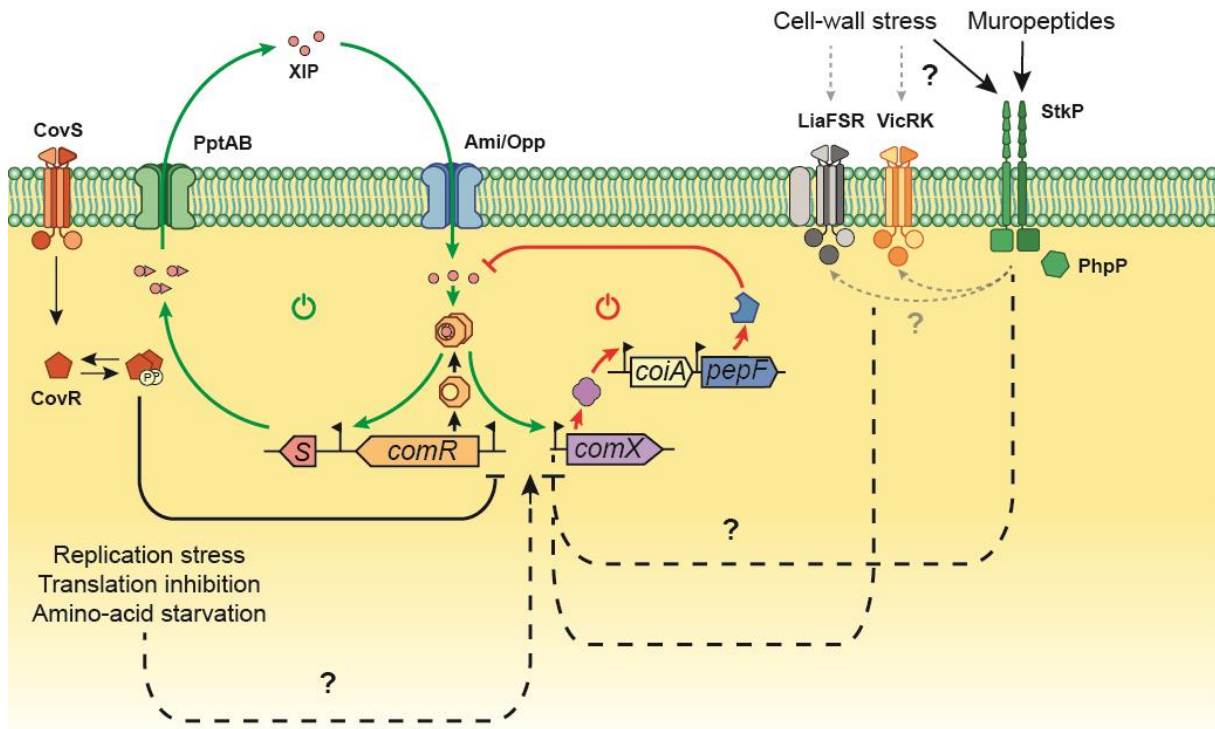

882

883 **Figure 6. Model of competence regulation integrating cell-wall sensors and physiological**  
884 **stresses in *S. salivarius*.** Upon CovRS repression release, ComR reaches a threshold  
885 concentration allowing the activation of a positive feedback loop (green arrows, power-on  
886 icon). The positive loop is triggered by XIP binding to ComR, producing the ComR•XIP  
887 complex which activates *comS* transcription. ComS is then exported by the transporter PptAB  
888 and matured. The mature XIP pheromone can then enter the cell by the oligopeptide generic  
889 transporter Ami/Opp and bind ComR to enhance the loop. In parallel, the ComR•XIP complex  
890 will trigger the transcription of *comX*, encoding the central regulator of competence. This will  
891 activate all the late genes necessary for natural transformation including the *coiA-pepF* operon.  
892 PepF accumulation will result in XIP degradation, generating a negative feedback-loop (red  
893 arrows, power-off icon) on the ComRS system, ultimately leading to competence exit. In  
894 parallel, cell-wall stress and/or free mucopeptides can be sensed by the serine-threonine kinase  
895 StkP, LiaFSR and VicRK to modulate the transcriptional activation of *comX*, most probably via  
896 interfering with the activity of the ComR•XIP complex. Other physiological stresses such as  
897 replication stress, translation inhibition or amino-acid starvation were also identified as  
898 conditions that could activate competence development.

899
